# Supplementary material for: Asymmetric synthesis of CF 2 -functionalized aziridines by combined strong Brønsted acid catalysis
Source: publisher site journal article supplement (doi:10.3762/bjoc.16.60), 2020-04-07
Supplement: Additional file 1 [file 1860-5397-16-60-S1.pdf]

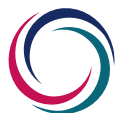

## Supporting Information

for

### **Asymmetric synthesis of CF<sub>2</sub>-functionalized aziridines by combined strong Brønsted acid catalysis**

Xing-Fa Tan, Fa-Guang Zhang and Jun-An Ma

*Beilstein J. Org. Chem.* **2020**, *16*, 638–644. doi:10.3762/bjoc.16.60

**Experimental procedures, compound characterization, NMR spectra of all new compounds, and HPLC traces**

## Contents

|                                                                                                                                      |            |
|--------------------------------------------------------------------------------------------------------------------------------------|------------|
| <b>1 General information .....</b>                                                                                                   | <b>S3</b>  |
| <b>2 Experimental Section and HPLC charts for chiral compounds 4 and 5 .....</b>                                                     | <b>S4</b>  |
| <b>2.1 Typical procedure I: preparation of racemic <i>cis</i>-CF<sub>2</sub>-aziridine 4 .....</b>                                   | <b>S4</b>  |
| <b>2.2 Typical procedure II: preparation of chiral <i>cis</i>-CF<sub>2</sub>-aziridine 4 .....</b>                                   | <b>S4</b>  |
| <b>2.3 Preparation of compound 5a .....</b>                                                                                          | <b>S14</b> |
| <b>2.4 Preparation of compound 5b .....</b>                                                                                          | <b>S15</b> |
| <b>2.5 Preparation of compound 5c .....</b>                                                                                          | <b>S17</b> |
| <b>3 References .....</b>                                                                                                            | <b>S18</b> |
| <b>4 NMR spectra of all the new compounds .....</b>                                                                                  | <b>S19</b> |
| <b>5 X-ray crystallographic data .....</b>                                                                                           | <b>S36</b> |
| <b>5.1 X-ray crystallographic structures for compound 4a. Crystal data have<br/>    been deposited to CCDC, number 1983642 .....</b> | <b>S36</b> |
| <b>5.2 X-ray crystallographic structures for compound 5c. Crystal data have<br/>    been deposited to CCDC, number 1983643 .....</b> | <b>S37</b> |

## 1 General information

$^1\text{H}$ ,  $^{13}\text{C}$  and  $^{19}\text{F}$  NMR spectra were recorded on a Bruker AV 400 MHz instrument at 400 MHz ( $^1\text{H}$  NMR), 101 MHz ( $^{13}\text{C}$  NMR), as well as 377 MHz ( $^{19}\text{F}$  NMR), or a Bruker AV at 500 MHz instrument at 500 MHz ( $^1\text{H}$  NMR). Chemical shifts are reported in ppm down field from the internal standard  $\text{Me}_4\text{Si}$  and external  $\text{CCl}_3\text{F}$ , respectively. The multiplicity is indicated as follows: s (singlet), d (doublet), t (triplet), q (quartet), m (multiplet), dd (doublet of doublets), ddd (doublet of doublets of doublets), tt (triplet of triplets), dt (triplet of doublets), ddt (triplet of doublets of doublets). Coupling constants are reported in Hertz (Hz). MS were recorded on a VG ZABHS spectrometer with an ESI source. High resolution mass spectrometry (HRMS) spectra were obtained on a Bruker microTOF-QII instrument. Optical rotations were determined using an Autopol IV-T. HPLC analyses were carried out on a HewlettPackard Model HP 1200 instrument. X-ray structural analysis was conducted on a Bruker APEX-II CCD instrument.

**Materials:** Tetrahydrofuran (THF), diethyl ether ( $\text{Et}_2\text{O}$ ) and toluene (Tol) were distilled from sodium/benzophenone prior to use;  $\text{CH}_2\text{Cl}_2$  (DCM) and  $\text{ClCH}_2\text{CH}_2\text{Cl}$  (DCE) were distilled from  $\text{CaH}_2$ . MeCN was distilled from  $\text{P}_2\text{O}_5$ ; All purchased reagents were used without further purification. Analytical thin layer chromatography was performed on 0.20 mm Qingdao Haiyang silica gel plates. Silica gel (200-300 mesh) (from Qingdao Haiyang Chem. Company, Ltd.) was used for flash chromatography. ((2-diazo-1,1-difluoroethyl)sulfonyl)benzene (Ps-DFA) were prepared according to the reported procedure.<sup>1</sup> Chiral disulfonimide catalysts **CDSI-1**, **CDSI-2**, **CDSI-3**, **CDSI-4**, **CDSI-5**, **CDSI-6** were synthesized according to the known procedures.<sup>2</sup> 2-Borono-4-(trifluoromethyl)benzoic acid ( **$\text{CF}_3\text{-COOH-BA}$** ) used in this work is a known compound and was prepared according to literature procedures.<sup>3</sup>  $\text{Mg}(\text{TMP})_2$ <sup>4</sup> and 2,2-dihydroxy-1-arylethan-1-one<sup>5</sup> were both prepared according to the literature.

## 2 Experimental section and HPLC charts for the chiral compounds 4 and 5

### 2.1 Typical procedure I: preparation of racemic *cis*-CF<sub>2</sub>-aziridine 4

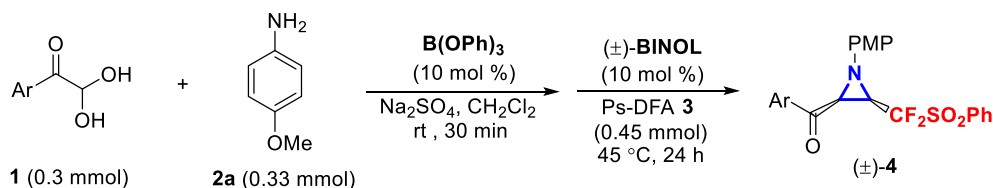

To a 25 mL Schlenk tube equipped with a reflux condenser and an argon balloon at the top of the condenser through a rubber septum was added 2,2-dihydroxy-1-arylethan-1-one (**1**, 0.3 mmol, 1 equiv), 4-methoxyaniline (**2a**, 40.6 mg, 0.33 mmol), triphenyl borate B(OPh)<sub>3</sub> (8.7 mg, 0.03 mmol), anhydrous Na<sub>2</sub>SO<sub>4</sub> (200 mg) and CH<sub>2</sub>Cl<sub>2</sub> (1 mL) at room temperature under an argon atmosphere. After reacting for 30 minutes at room temperature, the ((2-diazo-1,1-difluoroethyl)sulfonyl)benzene (Ps-DFA **3**, 104.5 mg, 77.4 μL, 0.45 mmol) was added with a micro syringe and racemic 1,1'-bi-2-naphthol (BINOL, 8.6 mg, 0.03 mmol) in CH<sub>2</sub>Cl<sub>2</sub> (1 mL) was added dropwise. The reaction was allowed to stir for 24 hours at 45 °C under an argon atmosphere until the consumption of substrates was completed (monitored by TLC). The reaction mixture was extracted with CH<sub>2</sub>Cl<sub>2</sub> three times. The combined organic layer was washed with water and brine, and then dried over anhydrous Na<sub>2</sub>SO<sub>4</sub>, filtered and evaporated under vacuum. The residue was purified by neutral alumina column chromatography (eluting with dichloromethane/petroleum ether) to give racemic *cis*-CF<sub>2</sub>-aziridine **4**.

### 2.2 Typical procedure II: preparation of chiral *cis*-CF<sub>2</sub>-aziridine 4

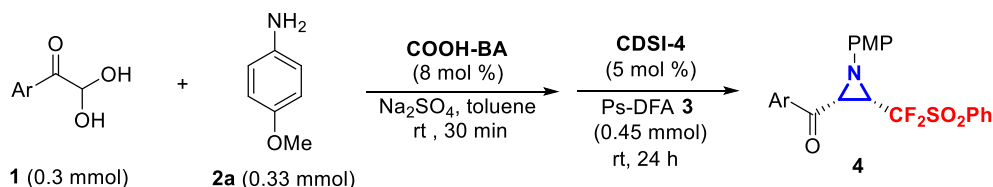

To a 25 mL Schlenk tube equipped with a stirring bar were added 2,2-dihydroxy-1-arylethan-1-one (**1**, 0.3 mmol, 1 equiv), 4-methoxyaniline (**2a**, 40.6 mg, 0.33 mmol), 2-boronobenzoic acid (COOH-BA, 3.98 mg, 0.024 mmol), anhydrous Na<sub>2</sub>SO<sub>4</sub> (200 mg) and toluene (1 mL) at room temperature under argon atmosphere. After reacting for 30 minutes at room temperature, the ((2-diazo-1,1-difluoroethyl)sulfonyl)benzene (Ps-DFA, **3**, 104.5 mg, 77.4 uL, 0.45 mmol) was added with a micro syringe and CDSI-4 (12.3 mg, 0.015 mmol) in toluene (1 mL) was added dropwise. The reaction was allowed to stir for 24 hours at room temperature under an argon atmosphere until the consumption of substrates was completed (monitored by TLC). The reaction mixture was quenched with saturated aq. NaHCO<sub>3</sub> and extracted with ethyl acetate three times. The combined organic layer was washed with water and brine, and then dried over anhydrous Na<sub>2</sub>SO<sub>4</sub>, filtered and evaporated under vacuum. The residue was purified by neutral alumina column chromatography (eluting with dichloromethane/petroleum ether) to give *cis*-CF<sub>2</sub>-aziridine **4**. The enantiomeric excess was determined by chiral HPLC analysis.

**((2*R*,3*S*)-3-(Difluoro(phenylsulfonyl)methyl)-1-(4-methoxyphenyl)aziridin-2-yl)(phenyl)methanone (4a)**

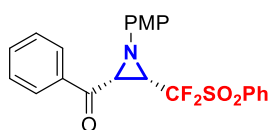

The *cis*-CF<sub>2</sub>-aziridine **4a** was obtained as white solid after neutral alumina column chromatography (petroleum ether/dichloromethane = 2:1), 85 mg, 64% yield, 73% ee; M.p. 175.8-176.7 °C; R<sub>f</sub> = 0.3 (dichloromethane/ petroleum ether = 3:1); **4a** with 73% ee (85 mg) was dissolved in an appropriate amount of isopropanol (0.15 mL/mg) with ultrasound for 3 minutes, followed by filtration, and the obtained solution was concentrated to give **4a** with more than 99% ee; repeating the above operation led to 99% ee analyzed by HPLC. The obtained solution was combined and concentrated to give **4a** (40% yield, >99% ee).

**<sup>1</sup>H NMR** (400 MHz, CDCl<sub>3</sub>) δ 8.20 – 8.05 (m, 2H), 7.93 (d, *J* = 7.7 Hz, 2H), 7.71 (t, *J* = 7.5 Hz, 1H), 7.57 (dt, *J* = 15.6, 7.6 Hz, 3H), 7.46 (t, *J* = 7.7 Hz, 2H), 7.25 – 7.17 (m, 2H), 6.90 – 6.81 (m, 2H), 3.77 (s, 3H), 3.67 (d, *J* = 6.6 Hz, 1H), 3.57 (dt, *J* = 16.0, 6.1 Hz, 1H). **<sup>13</sup>C NMR** (101 MHz, CDCl<sub>3</sub>) δ 190.6, 156.7, 143.8, 135.8, 135.5, 134.1, 132.0, 130.9, 129.5, 129.0, 128.8, 121.2, 120.3 (dd, *J*<sub>C-F</sub> = 291.5, 283.7 Hz), 114.7, 55.6, 45.5, 42.2 (dd, *J*<sub>C-F</sub> = 30.2, 20.5 Hz). **<sup>19</sup>F NMR** (377 MHz, CDCl<sub>3</sub>) δ -102.81 (dd, *J* = 237.2, 5.7 Hz), -106.31 (dd, *J* = 237.2, 16.0 Hz). **HRMS** (ESI) *m/z* calcd for C<sub>23</sub>H<sub>20</sub>NO<sub>4</sub>F<sub>2</sub>S [M+H]<sup>+</sup>: 444.1081, found: 444.1081; [α]<sub>D</sub><sup>20</sup> = 67.2 (c 1.0, CH<sub>2</sub>Cl<sub>2</sub>), >99% ee; **HPLC** (column, Daicel Chirapak IC, n-Hexane/*i*-PrOH = 70/30, flow rate 1.0 mL/min, 20 °C detection UV 254 nm) *t*<sub>R</sub> of major isomer 38.1 min, *t*<sub>R</sub> of minor isomer 26.3 min.

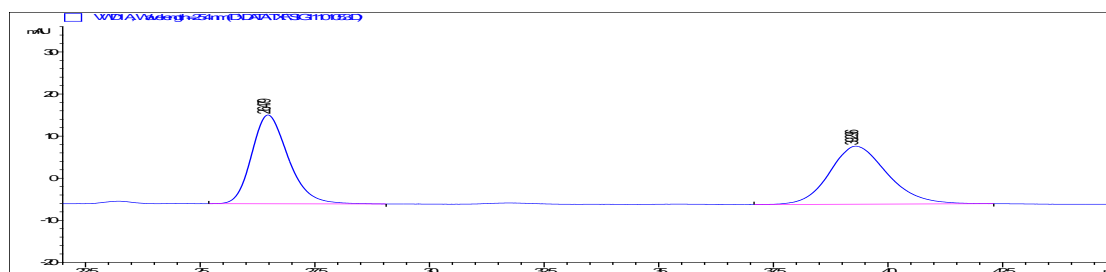

| Peak # | Ret.Time (min) | Area mAU * S | Height (mAU) | Width (min) | Symmetry Factor | Area (%) |
|--------|----------------|--------------|--------------|-------------|-----------------|----------|
| 1      | 26.479         | 1173.6       | 21.1         | 0.8439      | 0.762           | 49.265   |
| 2      | 39.296         | 1208.6       | 13.8         | 1.1724      | 0.808           | 50.735   |

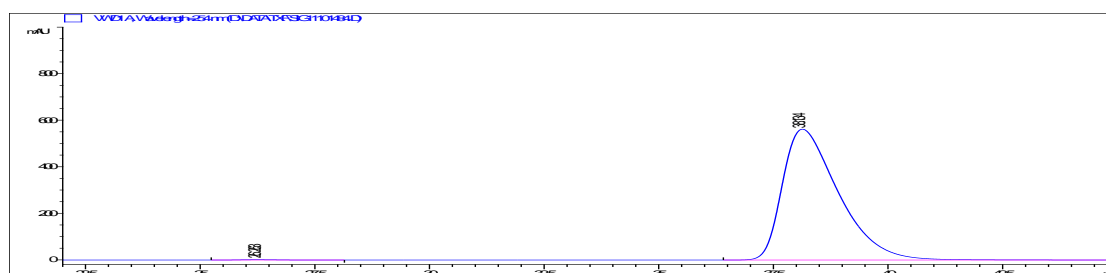

| Peak # | Ret.Time (min) | Area mAU *S | Height (mAU) | Width (min) | Symmetry Factor | Area (%) |
|--------|----------------|-------------|--------------|-------------|-----------------|----------|
| 1      | 26.263         | 85.3        | 1.5          | 0.6986      | 0.868           | 0.178    |
| 2      | 38.134         | 47676       | 561.9        | 1.2956      | 0.52            | 99.822   |

**((2*R*,3*S*)-3-(difluoro(phenylsulfonyl)methyl)-1-(4-methoxyphenyl)aziridin-2-yl)(p-tolyl)methanone (4b)**

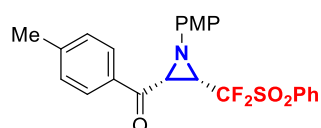

The *cis*-CF<sub>2</sub>-aziridine **4b** was obtained as white solid after neutral alumina column chromatography (petroleum ether/dichloromethane = 2:1), 90 mg, 66% yield, 66% ee; M.p. 154.3-154.9 °C; R<sub>f</sub> = 0.2 (dichloromethane/ petroleum ether = 3:1); **4b** with 66% ee (90 mg) was dissolved in an appropriate amount of isopropanol (0.1 mL/mg) with ultrasound for 3 minutes, followed by filtration, and the obtained solution was concentrated to give **4b** with more than 99% ee. Repeating the above operation led to 99% ee analyzed by HPLC; The obtained solution was combined and concentrated to give **4b** (46% yield, >99% ee).

**<sup>1</sup>H NMR** (400 MHz, CDCl<sub>3</sub>) δ 8.04 (d, *J* = 8.2 Hz, 2H), 7.95 (d, *J* = 7.8 Hz, 2H), 7.73 (t, *J* = 7.5 Hz, 1H), 7.57 (t, *J* = 7.8 Hz, 2H), 7.30 – 7.26 (m, 2H), 7.24 (t, *J* = 6.1 Hz, 2H), 6.87 (d, *J* = 8.9 Hz, 2H), 3.79 (s, 3H), 3.67 (d, *J* = 6.6 Hz, 1H), 3.57 (dt, *J* = 16.2, 6.1 Hz, 1H), 2.41 (s, 3H). **<sup>13</sup>C NMR** (101 MHz, CDCl<sub>3</sub>) δ 190.1, 156.7, 145.1, 143.9, 135.8, 133.0, 132.0, 130.9, 129.4, 129.1, 121.2, 120.3 (dd, *J*<sub>C-F</sub> = 291.6, 283.7 Hz), 114.7, 55.6, 45.5, 42.1 (dd, *J*<sub>C-F</sub> = 30.3, 20.4 Hz), 21.8. **<sup>19</sup>F NMR** (377 MHz, CDCl<sub>3</sub>) δ -102.84 (dd, *J* = 237.2, 4.2 Hz), -106.52 (dd, *J* = 237.1, 16.2 Hz). **HRMS** (ESI) *m/z* calcd for C<sub>24</sub>H<sub>22</sub>NO<sub>4</sub>F<sub>2</sub>S [M+H]<sup>+</sup>: 458.1238, found: 458.1237; [α]<sub>D</sub><sup>20</sup> = 91.4 (c 1.0, CH<sub>2</sub>Cl<sub>2</sub>), >99% ee; **HPLC** (column, Daicel Chirapak IC, n-Hexane/i-PrOH = 70/30, flow rate 1.0 mL/min, 20 °C detection UV 254 nm) *t*<sub>R</sub> of major isomer 48.8 min, *t*<sub>R</sub> of minor isomer 30.2 min.

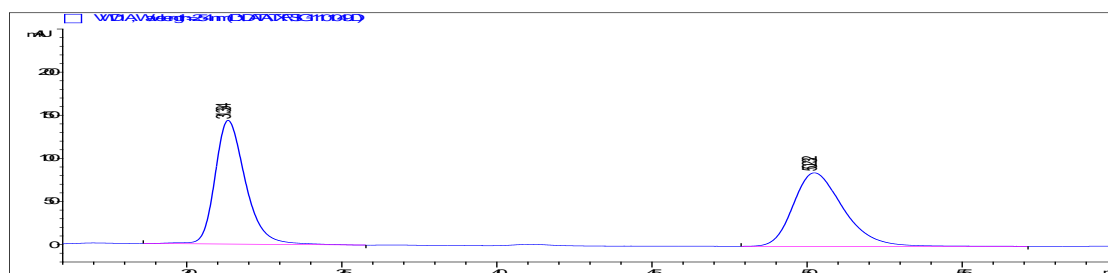

| Peak # | Ret.Time (min) | Area mAU *S | Height (mAU) | Width (min) | Symmetry Factor | Area (%) |
|--------|----------------|-------------|--------------|-------------|-----------------|----------|
| 1      | 31.334         | 9801.6      | 143.4        | 1.048       | 0.715           | 50.756   |
| 2      | 50.232         | 9509.5      | 85.1         | 1.659       | 0.701           | 49.244   |

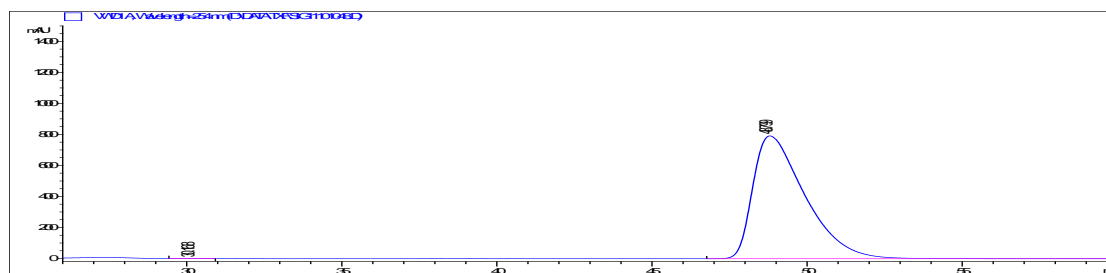

| Peak # | Ret.Time (min) | Area mAU * S | Height (mAU) | Width (min) | Symmetry Factor | Area (%) |
|--------|----------------|--------------|--------------|-------------|-----------------|----------|
| 1      | 30.168         | 48.8         | 1.1          | 0.6399      | 1.076           | 0.053    |
| 2      | 48.799         | 92497.9      | 792.1        | 1.7643      | 0.455           | 99.947   |

**((2*R*,3*S*)-3-(Difluoro(phenylsulfonyl)methyl)-1-(4-methoxyphenyl)aziridin-2-yl)(*m*-tolyl)methanone (4c)**

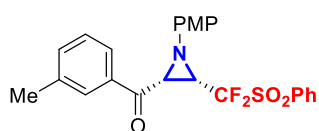

The *cis*-CF<sub>2</sub>-aziridine **4c** was obtained as white solid after neutral alumina column chromatography (petroleum ether/dichloromethane = 2:1), 94 mg, 70% yield, 69% ee; M.p. 157.0-158.0 °C; R<sub>f</sub> = 0.3 (dichloromethane/ petroleum ether = 3:1); **4c** with 69% ee (94 mg) was dissolved in an appropriate amount of isopropanol (0.15 mL/mg) with ultrasound for 3 minutes, followed by filtration, and the obtained solid with increased ee; Repeating the above operation until the obtained solid was more than 99% ee analyzed by HPLC; The obtained solid **4c** (35% yield, >99% ee).

**<sup>1</sup>H NMR** (400 MHz, CDCl<sub>3</sub>) δ 7.92 (d, *J* = 8.1 Hz, 4H), 7.69 (t, *J* = 7.5 Hz, 1H), 7.53 (t, *J* = 7.8 Hz, 2H), 7.38 (d, *J* = 7.5 Hz, 1H), 7.33 (t, *J* = 7.5 Hz, 1H), 7.20 (d, *J* = 8.8 Hz, 2H), 6.84 (d, *J* = 8.9 Hz, 2H), 3.75 (s, 3H), 3.68 (d, *J* = 6.6 Hz, 1H), 3.56 (dt, *J* = 16.3, 6.1 Hz, 1H), 2.37 (s, 3H). **<sup>13</sup>C NMR** (101 MHz, CDCl<sub>3</sub>) δ 190.5, 156.5, 143.8, 138.5, 135.7, 135.3, 134.7, 131.8, 130.7, 129.3, 129.1, 128.5, 126.0, 121.0, 120.2 (dd, *J*<sub>C-F</sub> = 291.6, 283.4 Hz), 114.5, 55.4, 45.4, 42.0 (dd, *J*<sub>C-F</sub> = 30.4, 20.2 Hz), 21.2. **<sup>19</sup>F NMR** (377 MHz, CDCl<sub>3</sub>) δ -102.66 (dt, *J* = 237.2, 6.0 Hz), -106.51 (dt, *J* = 237.2, 15.9 Hz). **HRMS** (ESI) *m/z* calcd for C<sub>24</sub>H<sub>22</sub>NO<sub>4</sub>F<sub>2</sub>S [M+H]<sup>+</sup>: 458.1238, found: 458.1237; [α]<sub>D</sub><sup>20</sup> = 80.8 (c 1.0, CH<sub>2</sub>Cl<sub>2</sub>), 99% ee; **HPLC** (column, Daicel Chirapak IC, n-Hexane/*i*-PrOH = 70/30, flow rate 1.0 mL/min, 20 °C detection UV 254 nm) *t*<sub>R</sub> of major isomer 40.4 min, *t*<sub>R</sub> of minor isomer 27.1 min.

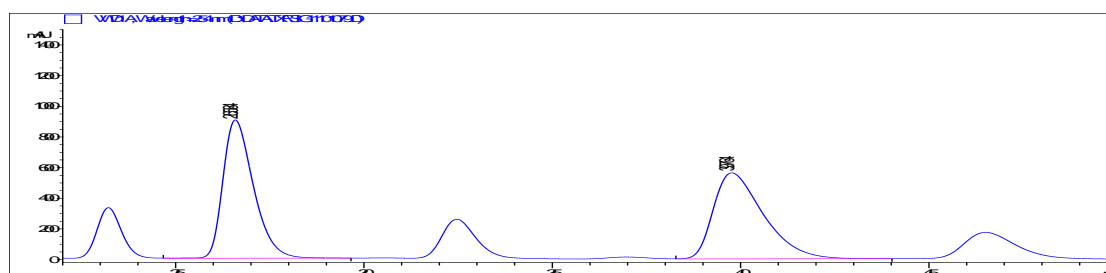

| Peak # | Ret.Time (min) | Area mAU *S | Height (mAU) | Width (min) | Symmetry Factor | Area (%) |
|--------|----------------|-------------|--------------|-------------|-----------------|----------|
| 1      | 26.584         | 50779.4     | 902.6        | 0.866       | 0.647           | 49.595   |
| 2      | 39.764         | 51609.3     | 560.9        | 1.4171      | 0.546           | 50.405   |

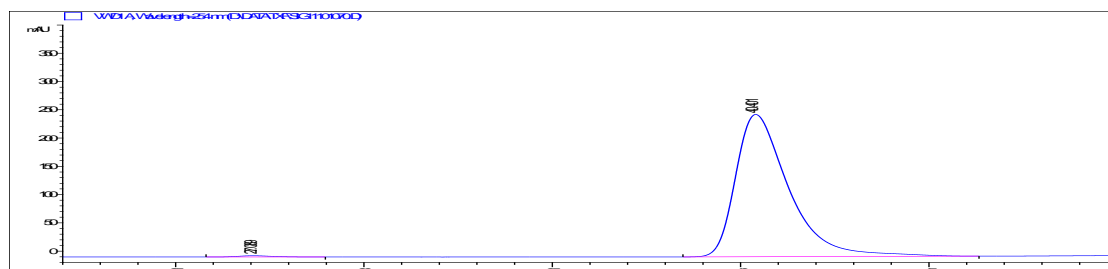

| Peak # | Ret.Time (min) | Area mAU *S | Height (mAU) | Width (min) | Symmetry Factor | Area (%) |
|--------|----------------|-------------|--------------|-------------|-----------------|----------|
| 1      | 27.089         | 136.4       | 2.2          | 0.752       | 0.886           | 0.551    |
| 2      | 40.401         | 24617.7     | 251.7        | 1.4701      | 0.565           | 99.449   |

**((2*R*,3*S*)-3-(Difluoro(phenylsulfonyl)methyl)-1-(4-methoxyphenyl)aziridin-2-yl)(4-ethylphenyl)methanone (4d)**

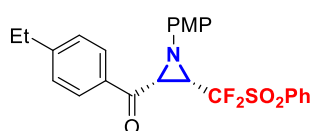

The *cis*-CF<sub>2</sub>-aziridine **4d** was obtained as white solid after neutral alumina column chromatography (petroleum ether/dichloromethane = 2:1), 75 mg, 53% yield, 65% ee; M.p. 160.8-161.6 °C; R<sub>f</sub> = 0.25 (dichloromethane/petroleum ether = 3:1); **4d** with 65% ee (75 mg) was dissolved in an appropriate amount of isopropanol (0.05 mL/mg) with ultrasound for 3 minutes, followed by filtration, and the obtained solution was concentrated to give **4d** with more than 99% ee; Repeating the above operation led to 99% ee analyzed by HPLC; The obtained solution was combined and concentrated to give **4d** (32% yield, >99% ee).

**<sup>1</sup>H NMR** (400 MHz, CDCl<sub>3</sub>) δ 8.05 (d, *J* = 8.2 Hz, 2H), 7.94 (d, *J* = 7.8 Hz, 2H), 7.71 (t, *J* = 7.5 Hz, 1H), 7.55 (t, *J* = 7.9 Hz, 2H), 7.28 (d, *J* = 8.2 Hz, 2H), 7.25 – 7.17 (m, 2H), 6.91 – 6.80 (m, 2H), 3.77 (s, 3H), 3.65 (d, *J* = 6.6 Hz, 1H), 3.61 – 3.51 (m, 1H), 2.69 (q, *J* = 7.6 Hz, 2H), 1.24 (t, *J* = 7.6 Hz, 3H). **<sup>13</sup>C NMR** (101 MHz, CDCl<sub>3</sub>) δ 190.1, 156.7, 151.2, 144.0, 135.8, 133.3, 132.1, 131.0, 129.5, 129.2, 128.3, 121.2, 120.3 (dd, *J*<sub>C-F</sub> = 291.6, 283.6 Hz), 114.7, 55.7, 45.5, 42.1 (dd, *J*<sub>C-F</sub> = 30.4, 20.2 Hz), 29.1, 15.1. **<sup>19</sup>F NMR** (377 MHz, CDCl<sub>3</sub>) δ -102.71 (dd, *J* = 237.2, 5.1 Hz), -106.61 (dd, *J* = 237.2, 16.3 Hz). **HRMS** (ESI) *m/z* calcd for C<sub>25</sub>H<sub>24</sub>NO<sub>4</sub>F<sub>2</sub>S [M+H]<sup>+</sup>: 472.1394, found: 472.1395; [α]<sub>D</sub><sup>20</sup> = 76.8 (c 1.0, CH<sub>2</sub>Cl<sub>2</sub>), 99% ee; **HPLC** (column, Daicel Chirapak IC, n-Hexane/i-PrOH = 70/30, flow rate 1.0 mL/min, 20 °C detection UV 254 nm) *t*<sub>R</sub> of major isomer 44.0 min, *t*<sub>R</sub> of minor isomer 30.1 min.



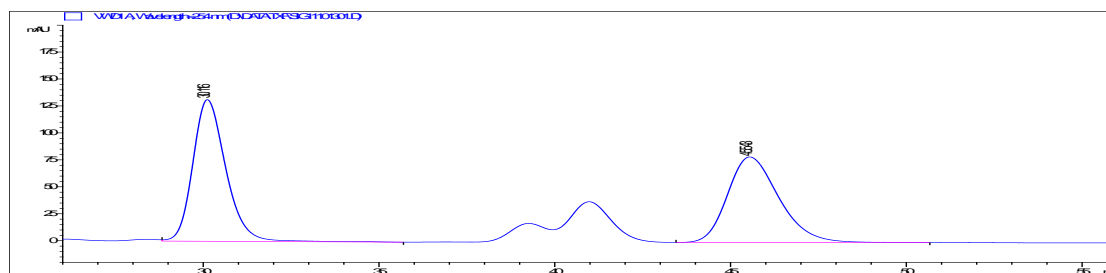

| Peak # | Ret.Time (min) | Area mAU * S | Height (mAU) | Width (min) | Symmetry Factor | Area (%) |
|--------|----------------|--------------|--------------|-------------|-----------------|----------|
| 1      | 30.116         | 8571.6       | 131.4        | 1           | 0.74            | 51.615   |
| 2      | 45.543         | 8035.2       | 79.3         | 1.5426      | 0.727           | 48.385   |

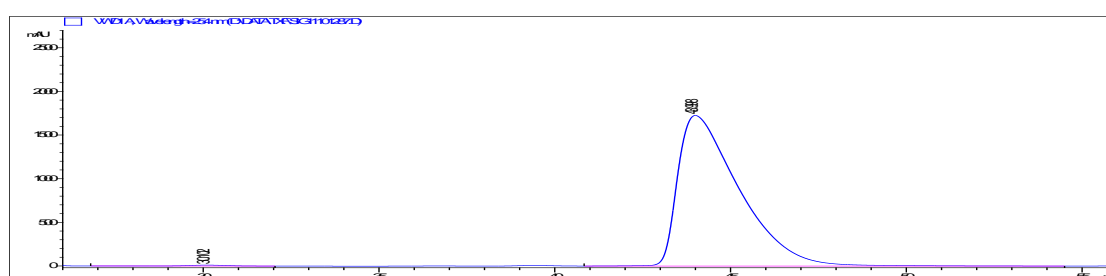

| Peak # | Ret.Time (min) | Area mAU * S | Height (mAU) | Width (min) | Symmetry Factor | Area (%) |
|--------|----------------|--------------|--------------|-------------|-----------------|----------|
| 1      | 30.102         | 908.9        | 10.8         | 1.2291      | 1.282           | 0.434    |
| 2      | 43.998         | 208671.1     | 1725.6       | 1.7894      | 0.374           | 99.566   |

**((2*R*,3*S*)-3-(Difluoro(phenylsulfonyl)methyl)-1-(4-methoxyphenyl)aziridin-2-yl)(4-fluorophenyl)methanone (**4e**)**

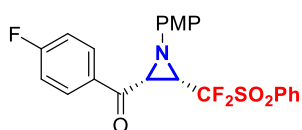

The *cis*-CF<sub>2</sub>-aziridine **4e** was obtained as white solid after neutral alumina column chromatography (petroleum ether/dichloromethane = 2:1), 61 mg, 44% yield, 48% ee; M.p. 150.1-150.8 °C; *R*<sub>f</sub> = 0.4 (dichloromethane/ petroleum ether = 3:1); **4e** with 48% ee (61 mg) was dissolved in an appropriate amount of isopropanol (0.05 mL/mg) with ultrasound for 3 minutes, followed by filtration, and the obtained solution was concentrated to give **4e** with more than 90% ee; Repeating the above operation led to 90% ee analyzed by HPLC; The obtained solution was combined and concentrated to give **4e** (27% yield, 95% ee determined by HPLC).

<sup>1</sup>H NMR (400 MHz, CDCl<sub>3</sub>) δ 8.23 – 8.12 (m, 2H), 7.94 (d, *J* = 7.7 Hz, 2H), 7.74 (t, *J* = 7.5 Hz, 1H), 7.57 (t, *J* = 7.9 Hz, 2H), 7.23 – 7.18 (m, 2H), 7.17 – 7.10 (m, 2H), 6.90 – 6.81 (m, 2H), 3.79 (s, 3H), 3.62 (d, *J* = 6.5 Hz, 1H), 3.55 (dt, *J* = 15.3, 6.4 Hz, 1H).

<sup>13</sup>C NMR (101 MHz, CDCl<sub>3</sub>) δ 189.3, 166.3 (d, *J*<sub>C-F</sub> = 254.9 Hz), 156.9, 143.7, 135.9, 132.1, 132.0, 131.9 (d, *J*<sub>C-F</sub> = 9.5 Hz), 131.0, 129.5, 121.2, 120.3 (dd, *J*<sub>C-F</sub> = 291.1,

284.0 Hz), 116.0 (d,  $J_{C-F}$  = 21.9 Hz), 114.9, 55.7, 45.4, 42.2 (dd,  $J_{C-F}$  = 29.7, 20.8 Hz).  **$^{19}\text{F}$  NMR** (377 MHz,  $\text{CDCl}_3$ )  $\delta$  -103.21 (tt,  $J$  = 8.4, 5.4 Hz), -103.35 (dd,  $J$  = 237.4, 6.2 Hz), -106.00 (dd,  $J$  = 237.4, 15.3 Hz). **HRMS** (ESI)  $m/z$  calcd for  $\text{C}_{23}\text{H}_{19}\text{NO}_4\text{F}_3\text{S}$   $[\text{M}+\text{H}]^+$ : 462.0987, found: 462.0980;  $[\alpha]_{\text{D}}^{20}$  = 61.6 (c 1.0,  $\text{CH}_2\text{Cl}_2$ ), 95% ee; **HPLC** (column, Daicel Chirapak IC, n-Hexane/i-PrOH = 70/30, flow rate 1.0 mL/min, 20 °C detection UV 254 nm)  $t_{\text{R}}$  of major isomer 31.2 min,  $t_{\text{R}}$  of minor isomer 22.4 min.

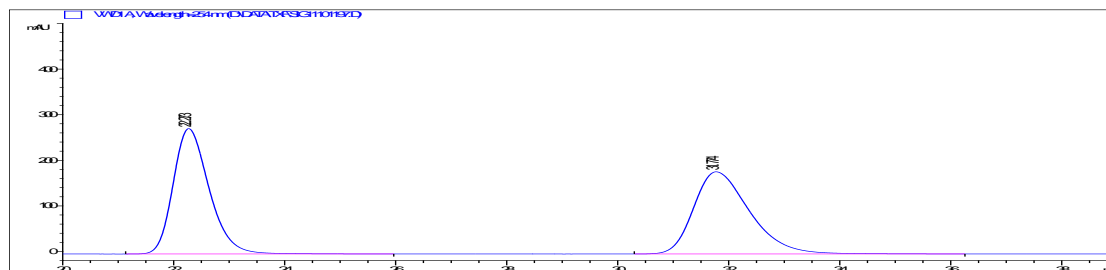

| Peak # | Ret.Time (min) | Area mAU * S | Height (mAU) | Width (min) | Symmetry Factor | Area (%) |
|--------|----------------|--------------|--------------|-------------|-----------------|----------|
| 1      | 22.273         | 12384.4      | 274.8        | 0.6946      | 0.723           | 49.578   |
| 2      | 31.774         | 12595.5      | 180.2        | 1.0574      | 0.645           | 50.422   |

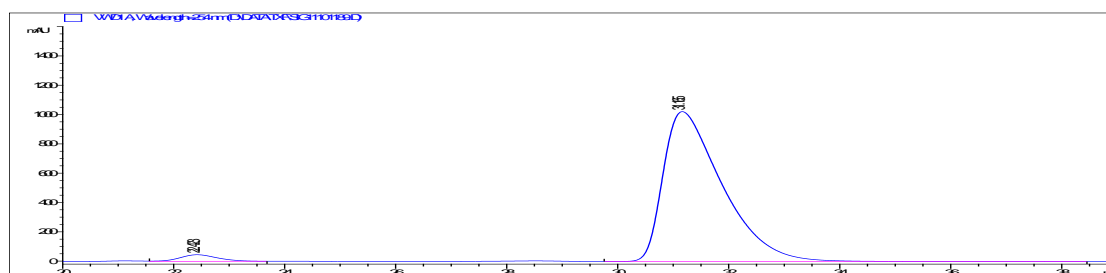

| Peak # | Ret.Time (min) | Area mAU * S | Height (mAU) | Width (min) | Symmetry Factor | Area (%) |
|--------|----------------|--------------|--------------|-------------|-----------------|----------|
| 1      | 22.423         | 2067.3       | 44.6         | 0.7123      | 0.834           | 2.667    |
| 2      | 31.165         | 75454.7      | 1022.4       | 1.1056      | 0.449           | 97.333   |

#### (4-Chlorophenyl)((2*R*,3*S*)-3-(difluoro(phenylsulfonyl)methyl)-1-(4-methoxyphenyl)aziridin-2-yl)methanone (**4f**)

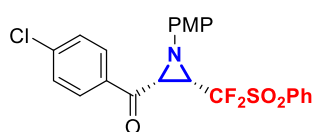

The *cis*- $\text{CF}_2$ -aziridine **4f** was obtained as white solid after neutral alumina column chromatography (petroleum ether/dichloromethane = 2:1), 59 mg, 41% yield, 49% ee; M.p. 134.9-135.8 °C;  $R_{\text{f}}$  = 0.4 (dichloromethane/ petroleum ether = 3:1); **4f** with 49% ee (59 mg) was dissolved in an appropriate amount of isopropanol (0.05 mL/mg) with ultrasound for 3 minutes, followed by filtration, and the obtained solution was concentrated to give **4f** with more than 90% ee; Repeating

the above operation led to 90% ee analyzed by HPLC; The obtained solution was combined and concentrated to give **4f** (26% yield, 97% ee determined by HPLC).

**<sup>1</sup>H NMR** (400 MHz, CDCl<sub>3</sub>) δ 8.08 (d, *J* = 8.6 Hz, 2H), 7.94 (d, *J* = 7.8 Hz, 2H), 7.74 (t, *J* = 7.5 Hz, 1H), 7.58 (t, *J* = 7.8 Hz, 2H), 7.44 (d, *J* = 8.5 Hz, 2H), 7.20 (d, *J* = 8.9 Hz, 2H), 6.87 (d, *J* = 8.9 Hz, 2H), 3.79 (s, 3H), 3.61 (d, *J* = 6.5 Hz, 1H), 3.55 (dt, *J* = 15.0, 6.4 Hz, 1H). **<sup>13</sup>C NMR** (101 MHz, CDCl<sub>3</sub>) δ 189.8, 156.9, 143.6, 140.7, 136.0, 133.9, 132.0, 131.0, 130.5, 129.6, 129.2, 121.2, 120.3 (dd, *J*<sub>C-F</sub> = 291.1, 284.2 Hz), 114.9, 55.7, 45.4, 42.3 (dd, *J*<sub>C-F</sub> = 29.6, 20.9 Hz). **<sup>19</sup>F NMR** (377 MHz, CDCl<sub>3</sub>) δ -103.35 (dd, *J* = 237.4, 6.3 Hz), -105.87 (dd, *J* = 237.4, 15.1 Hz). **HRMS** (ESI) *m/z* calcd for C<sub>23</sub>H<sub>19</sub>NO<sub>4</sub>F<sub>2</sub>SCl [M+H]<sup>+</sup>: 478.0691, found: 478.0693; [α]<sub>D</sub><sup>20</sup> = 58.4 (c 1.0, CH<sub>2</sub>Cl<sub>2</sub>), 97% ee; **HPLC** (column, Daicel Chirapak IC, n-Hexane/i-PrOH = 70/30, flow rate 1.0 mL/min, 20 °C detection UV 254 nm) *t*<sub>R</sub> of major isomer 29.9 min, *t*<sub>R</sub> of minor isomer 22.7 min.

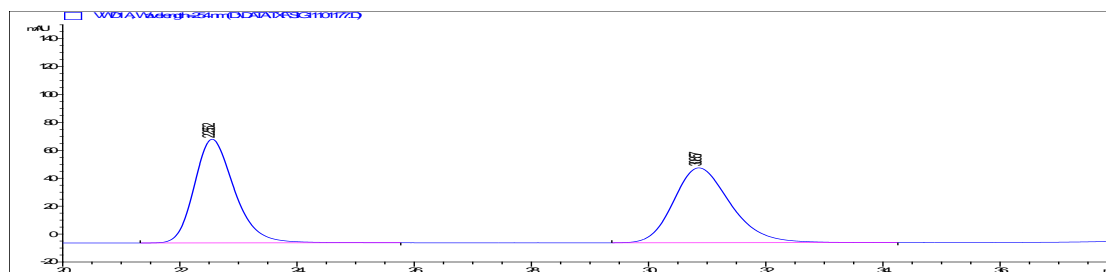

| Peak # | Ret.Time (min) | Area mAU * S | Height (mAU) | Width (min) | Symmetry Factor | Area (%) |
|--------|----------------|--------------|--------------|-------------|-----------------|----------|
| 1      | 22.552         | 3533.5       | 74.3         | 0.7295      | 0.751           | 49.357   |
| 2      | 30.857         | 3625.6       | 53.7         | 1.0384      | 0.752           | 50.643   |

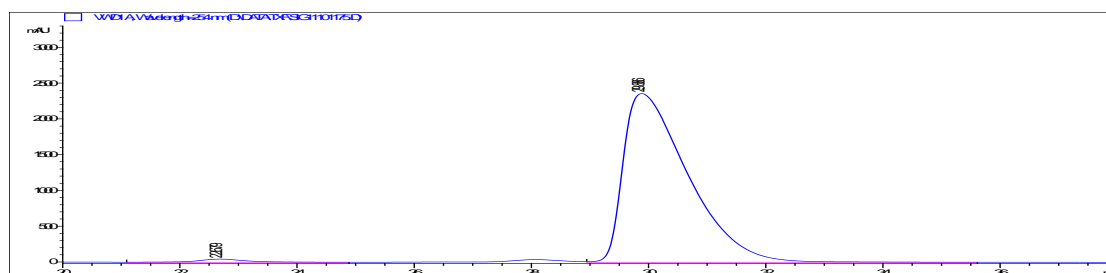

| Peak # | Ret.Time (min) | Area mAU * S | Height (mAU) | Width (min) | Symmetry Factor | Area (%) |
|--------|----------------|--------------|--------------|-------------|-----------------|----------|
| 1      | 22.679         | 2417.5       | 43.1         | 0.8233      | 0.769           | 1.324    |
| 2      | 29.886         | 180194.8     | 2357.7       | 1.1538      | 0.377           | 98.676   |

**(4-Bromophenyl)((2*R*,3*S*)-3-(difluoro(phenylsulfonyl)methyl)-1-(4-methoxyphenyl)aziridin-2-yl)methanone (**4g**)**

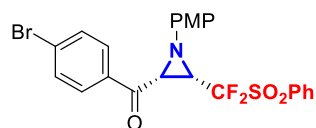

The *cis*-CF<sub>2</sub>-aziridine **4g** was obtained as white solid after neutral alumina column chromatography (petroleum ether/dichloromethane = 2:1), 60 mg, 38% yield, 35% ee; M.p. 146.1-146.9 °C; R<sub>f</sub> = 0.4 (dichloromethane/ petroleum ether = 3:1); **4g** with 35% ee (60 mg) was dissolved in an appropriate amount of isopropanol (0.2 mL/mg) with ultrasound for 3 minutes, followed by filtration, and the obtained solution was concentrated to give **4g** with more than 90% ee; Repeating the above operation led to 90% ee analyzed by HPLC; The obtained solution was combined and concentrated to give **4g** (20% yield, 95% ee determined by HPLC).

**<sup>1</sup>H NMR** (400 MHz, CDCl<sub>3</sub>) δ 8.00 (d, *J* = 8.5 Hz, 2H), 7.94 (d, *J* = 7.8 Hz, 2H), 7.74 (t, *J* = 7.5 Hz, 1H), 7.59 (dd, *J* = 17.1, 8.3 Hz, 4H), 7.23 – 7.15 (m, 2H), 6.87 (t, *J* = 6.0 Hz, 2H), 3.79 (s, 3H), 3.61 (d, *J* = 6.5 Hz, 1H), 3.55 (dt, *J* = 15.1, 6.4 Hz, 1H). **<sup>13</sup>C NMR** (101 MHz, CDCl<sub>3</sub>) δ 190.0, 156.9, 143.6, 135.9, 134.3, 132.2, 132.0, 131.0, 130.5, 129.6, 129.5, 121.2, 120.3 (dd, *J*<sub>C-F</sub> = 291.1, 284.2 Hz), 114.9, 55.7, 45.4, 42.3 (dd, *J*<sub>C-F</sub> = 29.7, 21.0 Hz). **<sup>19</sup>F NMR** (377 MHz, CDCl<sub>3</sub>) δ -103.34 (dd, *J* = 237.4, 6.3 Hz), -105.84 (dd, *J* = 237.4, 15.0 Hz). **HRMS** (ESI) *m/z* calcd for C<sub>23</sub>H<sub>19</sub>NO<sub>4</sub>F<sub>2</sub>SBr [M+H]<sup>+</sup>: 522.0186, found: 522.0184; [α]<sub>D</sub><sup>20</sup> = 53.8 (c 1.0, CH<sub>2</sub>Cl<sub>2</sub>), 95% ee; **HPLC** (column, Daicel Chirapak IC, n-Hexane/*i*-PrOH = 70/30, flow rate 1.0 mL/min, 20 °C detection UV 254 nm) *t*<sub>R</sub> of major isomer 33.2 min, *t*<sub>R</sub> of minor isomer 24.8 min.

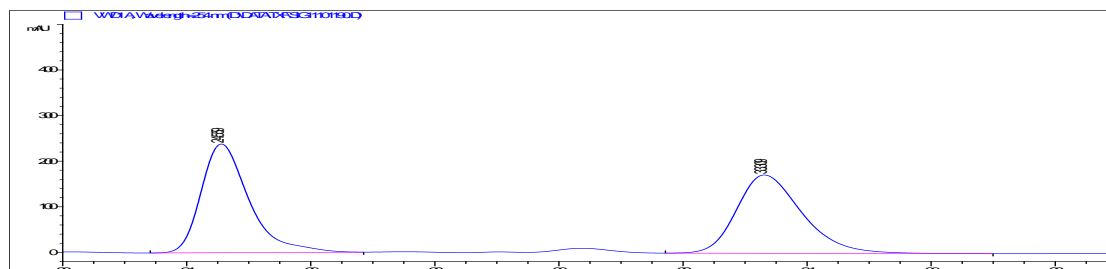

| Peak # | Ret.Time (min) | Area mAU *S | Height (mAU) | Width (min) | Symmetry Factor | Area (%) |
|--------|----------------|-------------|--------------|-------------|-----------------|----------|
| 1      | 24.559         | 12743.6     | 238.3        | 0.8191      | 0.689           | 50.344   |
| 2      | 33.309         | 12569.3     | 171.7        | 1.128       | 0.7             | 49.656   |

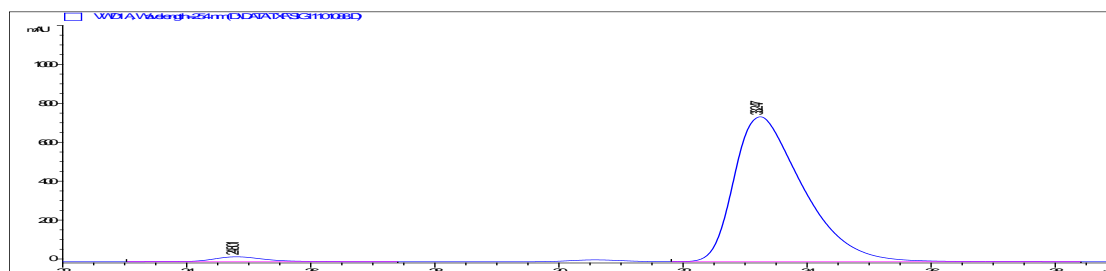

| Peak # | Ret.Time (min) | Area mAU * S | Height (mAU) | Width (min) | Symmetry Factor | Area (%) |
|--------|----------------|--------------|--------------|-------------|-----------------|----------|
| 1      | 24.801         | 1515.9       | 25.5         | 0.892       | 0.756           | 2.577    |
| 2      | 33.247         | 57306.3      | 744.6        | 1.157       | 0.574           | 97.423   |

**((2*R*,3*S*)-3-(Difluoro(phenylsulfonyl)methyl)-1-(4-methoxyphenyl)aziridin-2-yl)(naphthalen-2-yl)methanone (4h)**

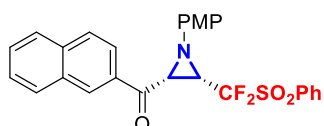

The *cis*-CF<sub>2</sub>-aziridine **4h** was obtained as white solid after neutral alumina column chromatography (petroleum ether/dichloromethane = 2:1), 70 mg, 47% yield, 50% ee; M.p. 163.6-164.5 °C; R<sub>f</sub> = 0.2 (dichloromethane/ petroleum ether = 3:1); **4h** with 50% ee (70 mg) was dissolved in an appropriate amount of isopropanol (0.2 mL/mg) with ultrasound for 3 minutes, followed by filtration, and the obtained solution was concentrated to give **4h** with 99% ee; Repeating the above operation led to 99% ee analyzed by HPLC; The obtained solution was combined and concentrated to give **4h** (22% yield, 99% ee).

**<sup>1</sup>H NMR** (400 MHz, CDCl<sub>3</sub>) δ 8.71 (s, 1H), 8.12 (dd, *J* = 8.6, 1.4 Hz, 1H), 7.99 – 7.82 (m, 5H), 7.67 (t, *J* = 7.5 Hz, 1H), 7.60 (t, *J* = 7.4 Hz, 1H), 7.57 – 7.48 (m, 3H), 7.31 – 7.21 (m, 2H), 6.88 (d, *J* = 8.8 Hz, 2H), 3.83 – 3.76 (m, 4H), 3.65 (dt, *J* = 15.8, 6.3 Hz, 1H). **<sup>13</sup>C NMR** (101 MHz, CDCl<sub>3</sub>) δ 190.5, 156.8, 143.9, 136.1, 135.8, 132.8, 132.5, 132.0, 131.3, 130.9, 130.0, 129.5, 129.1, 128.7, 127.9, 127.1, 124.1, 121.3, 120.4 (dd, *J*<sub>C-F</sub> = 291.5, 283.9 Hz), 114.8, 55.7, 45.7, 42.3 (dd, *J*<sub>C-F</sub> = 30.0, 20.5 Hz). **<sup>19</sup>F NMR** (377 MHz, CDCl<sub>3</sub>) δ -102.28 – -103.67 (m), -106.15 (ddd, *J* = 237.3, 15.8, 2.9 Hz). **HRMS** (ESI) *m/z* calcd for C<sub>27</sub>H<sub>22</sub>NO<sub>4</sub>F<sub>2</sub>S [M+H]<sup>+</sup>: 494.1238, found: 494.1235; [α]<sub>D</sub><sup>20</sup> = 107.4 (c 1.0, CH<sub>2</sub>Cl<sub>2</sub>), 99% ee; **HPLC** (column, Daicel Chirapak IC, n-Hexane/i-PrOH = 70/30, flow rate 1.0 mL/min, 20 °C detection UV 254 nm) *t*<sub>R</sub> of major isomer 48.4 min, *t*<sub>R</sub> of minor isomer 32.4 min.

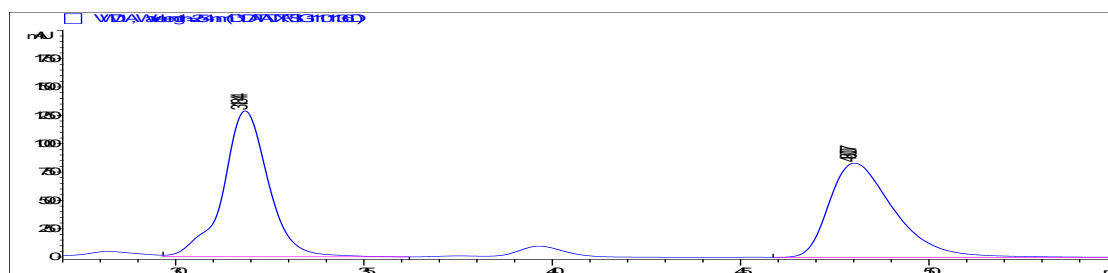

| Peak # | Ret.Time (min) | Area mAU * S | Height (mAU) | Width (min) | Symmetry Factor | Area (%) |
|--------|----------------|--------------|--------------|-------------|-----------------|----------|
| 1      | 31.844         | 107260.8     | 1285.3       | 1.2532      | 0.932           | 51.877   |
| 2      | 48.007         | 99500.1      | 830.4        | 1.8288      | 0.582           | 48.123   |

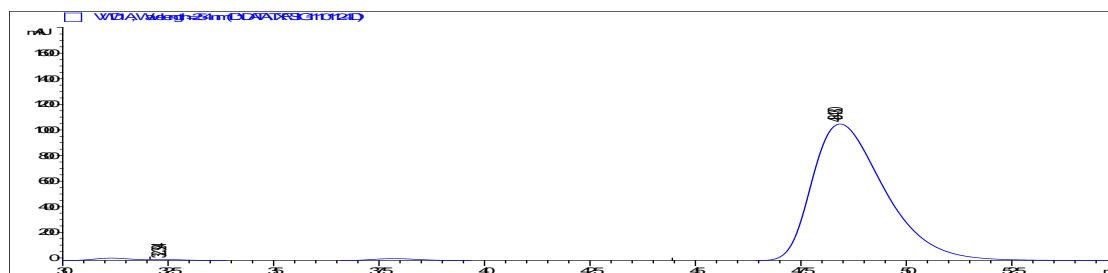

| Peak # | Ret.Time (min) | Area mAU * S | Height (mAU) | Width (min) | Symmetry Factor | Area (%) |
|--------|----------------|--------------|--------------|-------------|-----------------|----------|
| 1      | 32.394         | 629.7        | 9.5          | 0.9579      | 0.375           | 0.487    |
| 2      | 48.43          | 128714.2     | 1068.8       | 1.8593      | 0.586           | 99.513   |

### 2.3 Preparation of compound 5a<sup>6</sup>

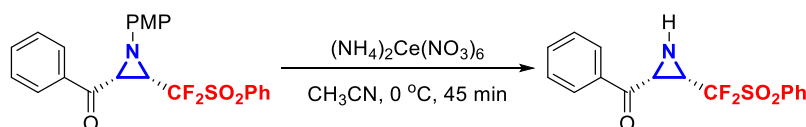

A solution of **4a** (44.3 mg, 0.1 mmol, >99.5% ee) in CH<sub>3</sub>CN (2 mL) in a Schlenk tube (25 mL) under an argon atmosphere was placed in an ice water bath and (NH<sub>4</sub>)<sub>2</sub>Ce(NO<sub>3</sub>)<sub>6</sub> (185 mg, 0.3 mmol) in H<sub>2</sub>O (1.4 mL) was added dropwise. After stirring at that temperature for 45 minutes, the reaction mixture was quenched with saturated aq Na<sub>2</sub>SO<sub>3</sub>, and extracted three times with CH<sub>2</sub>Cl<sub>2</sub>. The combined organic layer was washed with water and brine, and then dried over anhydrous Na<sub>2</sub>SO<sub>4</sub>, filtered and evaporated under vacuum. The obtained solid was purified by silica gel column chromatography (eluting with petroleum ether/ethyl acetate) to give ((2*R*,3*S*)-3-(difluoro(phenylsulfonyl)methyl)aziridin-2-yl)(phenyl)methanone (**5a**) as white solid with 81% yield, >99.9% ee. M.p. 165.8-166.4 °C; R<sub>f</sub> = 0.2 (petroleum ether/ethyl acetate = 5:1).

#### ((2*R*,3*S*)-3-(Difluoro(phenylsulfonyl)methyl)aziridin-2-yl)(phenyl)methanone (**5a**)

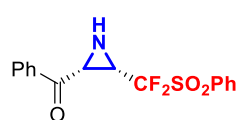

<sup>1</sup>H NMR (400 MHz, CDCl<sub>3</sub>) δ 8.07 (d, *J* = 7.4 Hz, 2H), 7.91 (d, *J* = 7.8 Hz, 2H), 7.73 (t, *J* = 7.5 Hz, 1H), 7.56 (tt, *J* = 23.4, 7.4 Hz, 5H), 3.64 (d, *J* = 5.1 Hz, 1H), 3.33 (s, 1H), 2.37 (s, 1H). <sup>13</sup>C NMR (101 MHz, CDCl<sub>3</sub>) δ 191.3, 135.9, 135.5, 134.2, 131.9, 131.0, 129.5, 128.9, 128.9, 120.8 (t, *J*<sub>C-F</sub> = 289.0 Hz), 39.0, 36.7 (t, *J*<sub>C-F</sub> = 25.2 Hz). <sup>19</sup>F NMR (377 MHz, CDCl<sub>3</sub>) δ -103.42 (dd, *J* = 235.3, 11.9 Hz), -104.66 (d, *J* = 234.5 Hz). HRMS (ESI) *m/z* calcd for C<sub>16</sub>H<sub>14</sub>NO<sub>3</sub>F<sub>2</sub>S [M+H]<sup>+</sup>: 338.0662, found: 338.0670; [α]<sub>D</sub><sup>20</sup> = 116.4 (c 1.0, CH<sub>2</sub>Cl<sub>2</sub>), >99.9% ee; HPLC (column, Daicel Chirapak IC, n-Hexane/i-

PrOH = 70/30, flow rate 1.0 mL/min, 20 °C detection UV 254 nm)  $t_R$  of major isomer 20.5 min,  $t_R$  of minor isomer 36.3 min.

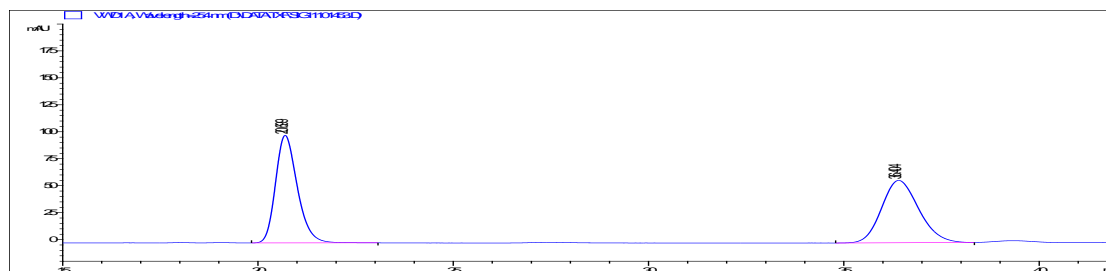

| Peak # | Ret.Time (min) | Area mAU *S | Height (mAU) | Width (min) | Symmetry Factor | Area (%) |
|--------|----------------|-------------|--------------|-------------|-----------------|----------|
| 1      | 20.699         | 3870.3      | 99.8         | 0.5922      | 0.748           | 50.352   |
| 2      | 36.404         | 3816.2      | 57.8         | 1.0235      | 0.818           | 49.648   |

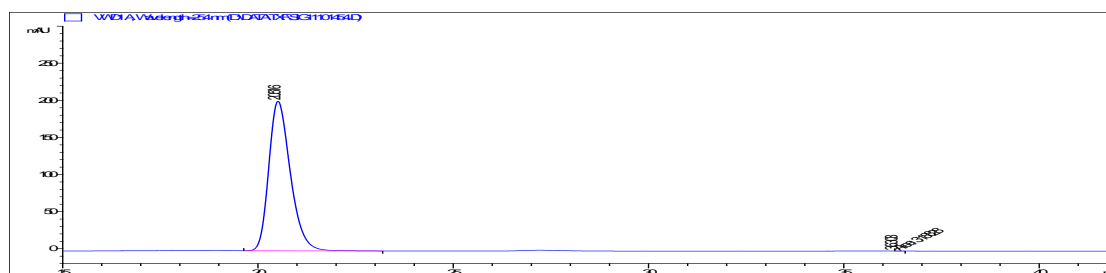

| Peak # | Ret.Time (min) | Area mAU *S | Height (mAU) | Width (min) | Symmetry Factor | Area (%) |
|--------|----------------|-------------|--------------|-------------|-----------------|----------|
| 1      | 20.516         | 7726.7      | 201.6        | 0.5899      | 0.708           | 99.959   |
| 2      | 36.303         | 3.2         | 3.1E-1       | 0.1296      | 0               | 0.041    |

## 2.4 Preparation of compound **5b**<sup>7</sup>

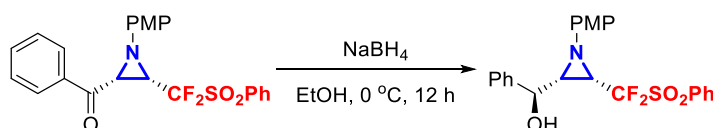

To a solution of **4a** (44.3 mg, 0.1 mmol, >99.5% ee) in EtOH (2 mL) in a round-bottom flask (10 mL) at 0 °C was added NaBH<sub>4</sub> (6 mg, 0.15 mmol) in small amounts. After being stirred at that temperature for 12 h, the reaction mixture was quenched by addition of H<sub>2</sub>O and acidified with 4 M aq HCl, and extracted three times with CH<sub>2</sub>Cl<sub>2</sub>. The combined organic layer was washed with water and brine, and then dried over anhydrous Na<sub>2</sub>SO<sub>4</sub>, filtered and evaporated under vacuum. The residue was purified by silica gel column chromatography (eluting with petroleum ether/ethyl acetate) to give ((2*R*,3*S*)-3-(difluoro(phenylsulfonyl)methyl)aziridin-2-yl)(phenyl)methanone (**5b**) as

white solid with 95% yield, >99.5% ee. M.p. 39.0-40.0 °C;  $R_f$  = 0.6 (petroleum ether/ethyl acetate = 5:1).

**(S)-((2R,3S)-3-(Difluoro(phenylsulfonyl)methyl)-1-(4-methoxyphenyl)aziridin-2-yl)(phenyl)methanol (5b)**

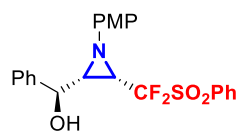

**$^1\text{H}$  NMR** (400 MHz,  $\text{CDCl}_3$ )  $\delta$  8.10 (d,  $J$  = 7.6 Hz, 2H), 7.84 (t,  $J$  = 7.5 Hz, 1H), 7.70 (t,  $J$  = 7.8 Hz, 2H), 7.61 (d,  $J$  = 7.1 Hz, 2H), 7.45 (t,  $J$  = 7.3 Hz, 2H), 7.42 – 7.36 (m, 1H), 6.65 – 6.57 (m, 2H), 6.39 (d,  $J$  = 8.9 Hz, 2H), 4.83 (d,  $J$  = 9.0 Hz, 1H), 3.73 – 3.61 (m, 4H), 3.02 (dt,  $J$  = 18.8, 6.0 Hz, 1H), 2.73 – 2.66 (m, 1H).  **$^{13}\text{C}$  NMR** (101 MHz,  $\text{CDCl}_3$ )  $\delta$  156.1, 144.7, 141.5, 136.2, 131.5, 131.1, 129.8, 128.8, 128.3, 126.4, 122.0 (t,  $J_{\text{C-F}}$  = 287.6 Hz), 120.4, 114.4, 71.5 (d,  $J$  = 5.8 Hz), 55.5, 51.4, 40.6 (dd,  $J_{\text{C-F}}$  = 25.5, 19.2 Hz).  **$^{19}\text{F}$  NMR** (377 MHz,  $\text{CDCl}_3$ )  $\delta$  -95.94 (dd,  $J$  = 236.0, 4.1 Hz), -108.40 (dd,  $J$  = 236.0, 18.9 Hz). **HRMS** (ESI)  $m/z$  calcd for  $\text{C}_{23}\text{H}_{22}\text{NO}_4\text{F}_2\text{S}$   $[\text{M}+\text{H}]^+$ : 446.1238, found: 446.1233;  $[\alpha]_{\text{D}}^{20}$  = -83.0 (c 1.0,  $\text{CH}_2\text{Cl}_2$ ), >99% ee; **HPLC** (column, Daicel Chirapak IC, n-Hexane/*i*-PrOH = 80/20, flow rate 1.0 mL/min, 20 °C detection UV 254 nm)  $t_R$  of major isomer 11.4 min,  $t_R$  of minor isomer 8.5 min. The stereochemistry of this compound was determined based on the  $^1\text{H}$ -NMR,  $^{19}\text{F}$ -NMR, and 2D-NOE analysis. In the 2D-NOE spectrum, the correlation between HO (4.83) and HC-N (2.7) was observed, whereas no correlation between HC-O (3.7) and HC- $\text{CF}_2$  (3.02) was found. See the spectrum part for details.

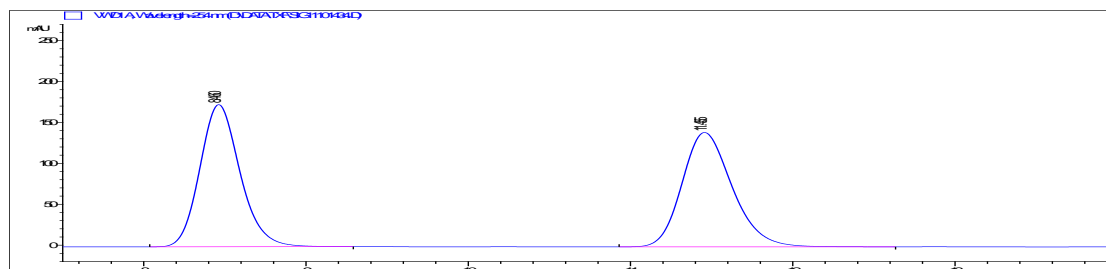

| Peak # | Ret.Time (min) | Area mAU * S | Height (mAU) | Width (min) | Symmetry Factor | Area (%) |
|--------|----------------|--------------|--------------|-------------|-----------------|----------|
| 1      | 8.46           | 2994         | 173.8        | 0.2651      | 0.833           | 49.926   |
| 2      | 11.455         | 3003         | 139.9        | 0.3291      | 0.777           | 50.074   |

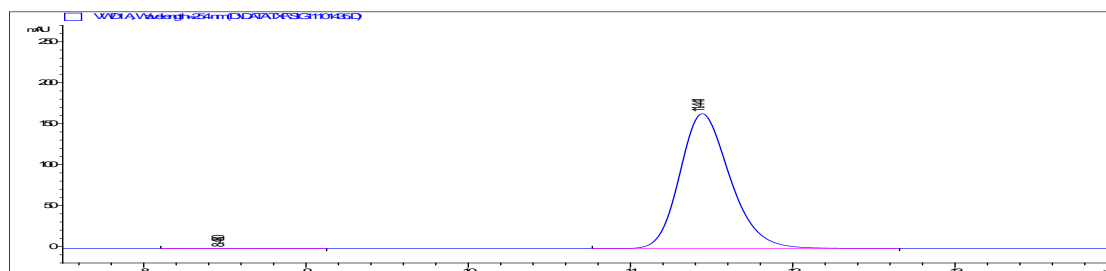



| Peak # | Ret.Time (min) | Area mAU *S | Height (mAU) | Width (min) | Symmetry Factor | Area (%) |
|--------|----------------|-------------|--------------|-------------|-----------------|----------|
| 1      | 8.48           | 5.3         | 2.8E-1       | 0.2694      | 0.926           | 0.148    |
| 2      | 11.441         | 3542.3      | 164.5        | 0.3328      | 0.769           | 99.852   |

## 2.5 Preparation of compound 5c<sup>8</sup>

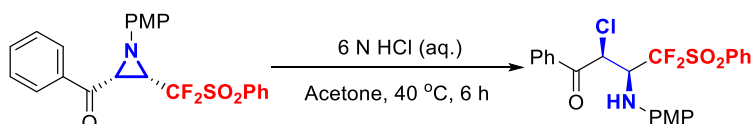

The *cis*-CF<sub>2</sub>-aziridine **4a** (44.3 mg, 0.1 mmol, >99.5% ee) was dissolved in acetone (4 mL) in a two-necked round-bottom flask. To this solution was added 6 N aq HCl (2 mL) dropwise at room temperature. The flask was then equipped with an air condenser and an argon balloon at the top of the condenser through a rubber septum. The solution was stirred at 40 °C for 6 hours until the consumption of **4a** was completed (monitored by TLC). The solution was then cooled to room temperature and quenched with saturated aq NaHCO<sub>3</sub> until no bubbles were generated, and extracted three times with CH<sub>2</sub>Cl<sub>2</sub>. The combined organic layer was washed with water and brine, and then dried over anhydrous Na<sub>2</sub>SO<sub>4</sub>, filtered and evaporated under vacuum. The obtained solid was dissolved in CH<sub>2</sub>Cl<sub>2</sub> (1 mL), and performed two-phase recrystallization with 45 mL of petroleum ether at room temperature. The (2*S*,3*R*)-2-chloro-4,4-difluoro-3-((4-methoxyphenyl)amino)-1-phenyl-4-(phenylsulfonyl)butan-1-one (**5c**) was collected as white solid with 89% yield, >99.9% ee. M.p. 140.3-141.2 °C; R<sub>f</sub> = 0.4 (petroleum ether/ethyl acetate = 5/1).

### (2*S*,3*R*)-2-Chloro-4,4-difluoro-3-((4-methoxyphenyl)amino)-1-phenyl-4-(phenylsulfonyl)butan-1-one (**5c**)

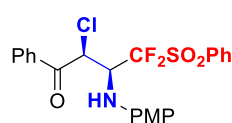

<sup>1</sup>H NMR (400 MHz, DMSO-d<sub>6</sub>) δ 7.92 (d, *J* = 7.5 Hz, 2H), 7.85 (t, *J* = 8.5 Hz, 3H), 7.73 (t, *J* = 7.4 Hz, 1H), 7.65 (t, *J* = 7.8 Hz, 2H), 7.59 (t, *J* = 7.7 Hz, 2H), 6.70 (d, *J* = 8.9 Hz, 2H), 6.58 (d, *J* = 8.9 Hz, 2H), 6.12 (d, *J* = 5.8 Hz, 1H), 5.75 (d, *J* = 11.2 Hz, 1H), 5.29 (ddt, *J* = 21.3, 10.8, 5.2 Hz, 1H), 3.66 (s, 3H). <sup>13</sup>C NMR (101 MHz, DMSO-d<sub>6</sub>) δ 191.1, 152.1, 139.9, 136.0, 134.4, 133.5, 132.7, 130.0, 129.7, 129.2, 128.7, 121.6 (t, *J*<sub>C-F</sub> = 295.7 Hz), 114.9, 114.3, 58.3, 55.2, 54.5 (dd, *J*<sub>C-F</sub> = 23.6, 17.8 Hz). <sup>19</sup>F NMR (377 MHz, DMSO-d<sub>6</sub>) δ -101.01 (dd, *J* = 234.2, 4.7 Hz), -109.11 (dd, *J* = 234.1, 20.6 Hz). **HRMS** (ESI) *m/z* calcd for C<sub>23</sub>H<sub>21</sub>NO<sub>4</sub>F<sub>2</sub>SCl [M+H]<sup>+</sup>: 480.0848, found: 480.0849; [α]<sub>D</sub><sup>20</sup> = -123.6 (c 1.0, CH<sub>2</sub>Cl<sub>2</sub>), >99% ee; **HPLC** (column, Daicel Chirapak IC, n-Hexane/i-PrOH = 90/10, flow rate 1.0 mL/min, 20 °C detection UV 254 nm) *t*<sub>R</sub> of major isomer 20.2 min, *t*<sub>R</sub> of minor isomer 26.2 min.

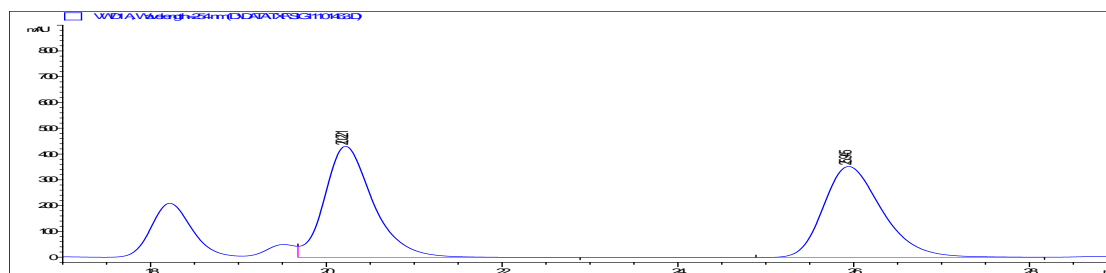

| Peak # | Ret.Time (min) | Area mAU * S | Height (mAU) | Width (min) | Symmetry Factor | Area (%) |
|--------|----------------|--------------|--------------|-------------|-----------------|----------|
| 1      | 20.221         | 16447.2      | 430.7        | 0.5824      | 0.718           | 50.090   |
| 2      | 25.945         | 16388.2      | 352.9        | 0.7135      | 0.707           | 49.910   |

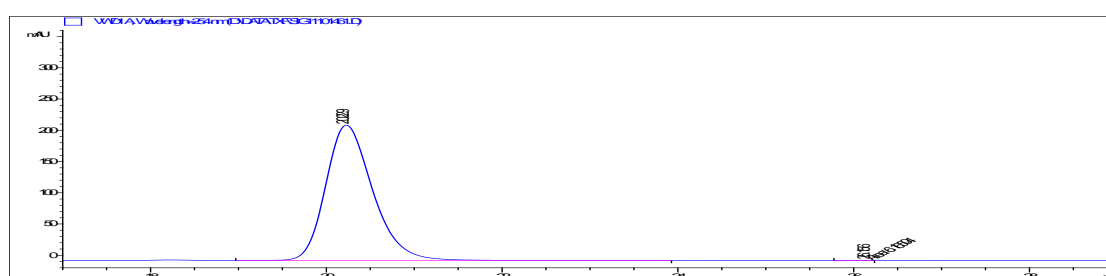

| Peak # | Ret.Time (min) | Area mAU * S | Height (mAU) | Width (min) | Symmetry Factor | Area (%) |
|--------|----------------|--------------|--------------|-------------|-----------------|----------|
| 1      | 20.229         | 8066.9       | 216.7        | 0.5713      | 0.739           | 99.924   |
| 2      | 26.156         | 6.2          | 1.2E-1       | 0.6309      | 5.851           | 0.076    |

### 3 Reference

- [1] Zeng, J.-L.; Zhang, F.-G.; Ma, J.-A. *Org. Lett.* **2019**, *21*, 8244.
- [2] He, H.; Le, A. W. M. *Eur. J. Org. Chem.* **2010**, 4181–4184.
- [3] Hashimoto, T.; Maruoka, K. *J. Am. Chem. Soc.* **2013**, *135*, 17667–17670.
- [4] Ooi, T.; Uematsu, Y.; Maruoka, K. *J. Org. Chem.* **2003**, *68*, 4576.
- [5] Wang, P.; Liao, S.; Tang, Y. *J. Am. Chem. Soc.* **2013**, *135*, 16849–16852.
- [6] Chai, Z.; Bouillon, J.-P.; Cahard, D. *Chem. Commun.* **2012**, *48*, 9471–9473.
- [7] Suzuki, T.; Mori, K.; Akiyama, T. *Org. Lett.* **2009**, *11*, 2445–2447.
- [8] Gupta, A. K.; Mukherjee, M.; Wulff, W. D. *Org. Lett.* **2011**, *13*, 5866–5869.

#### 4 NMR spectra of all the new compounds

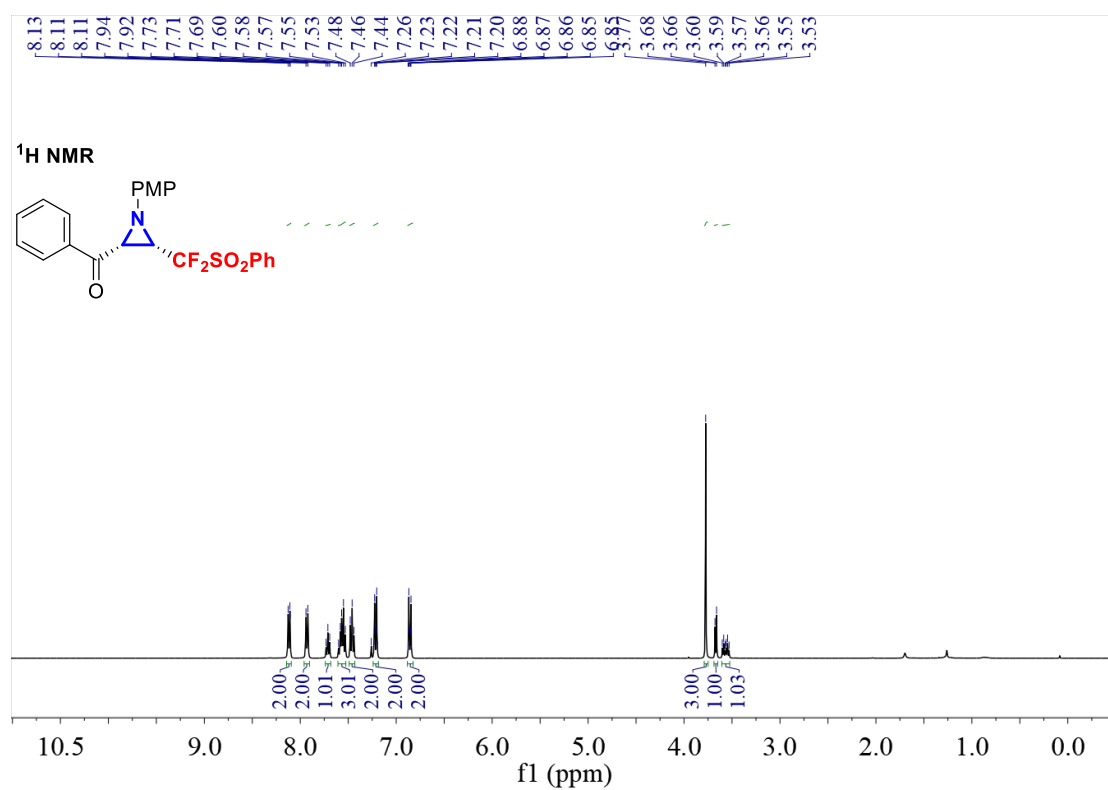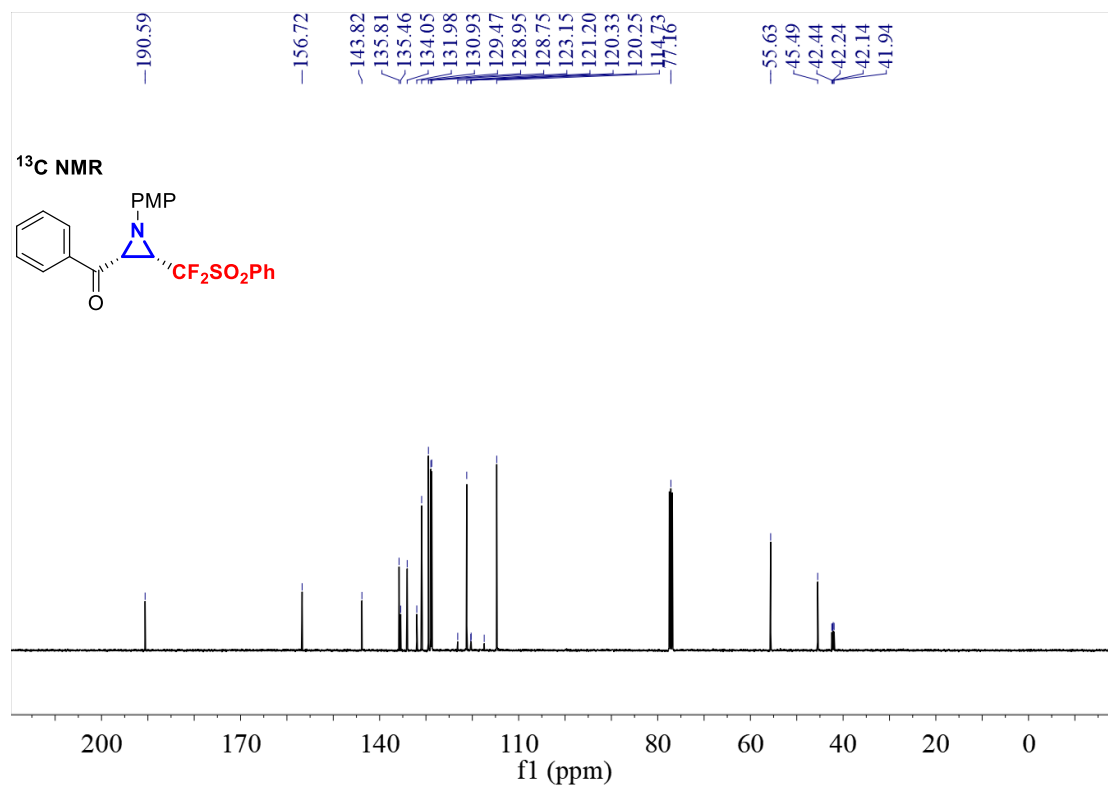

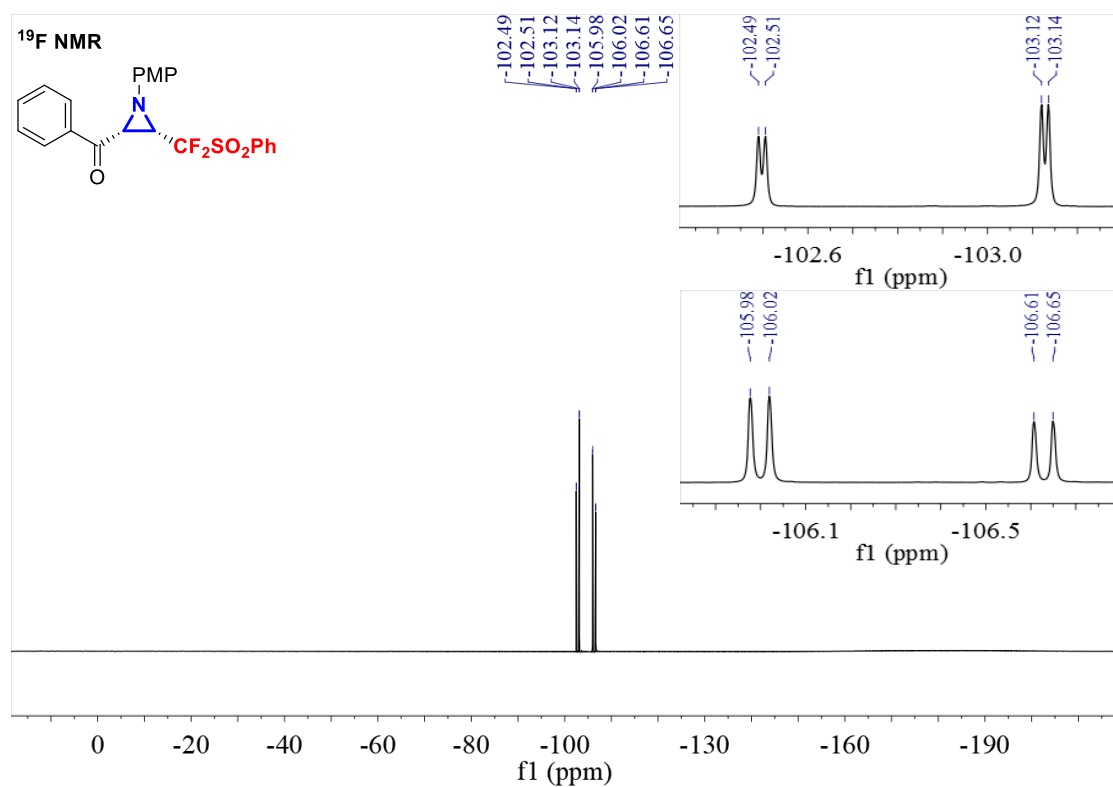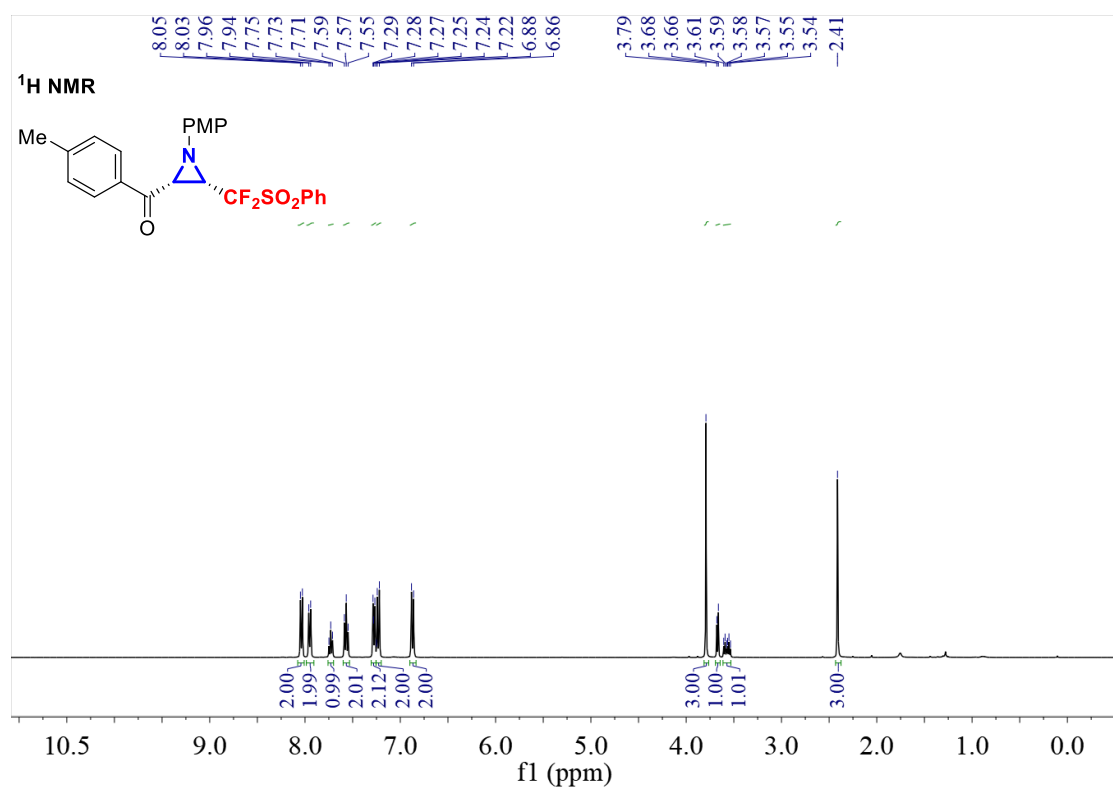

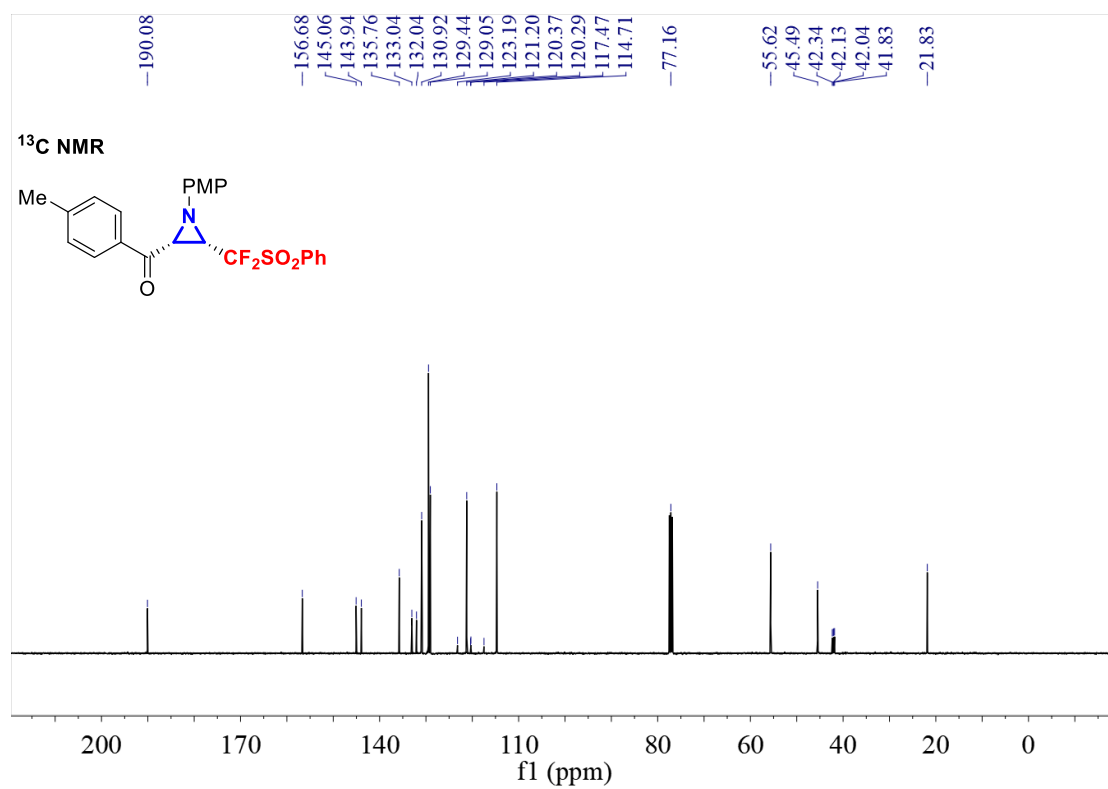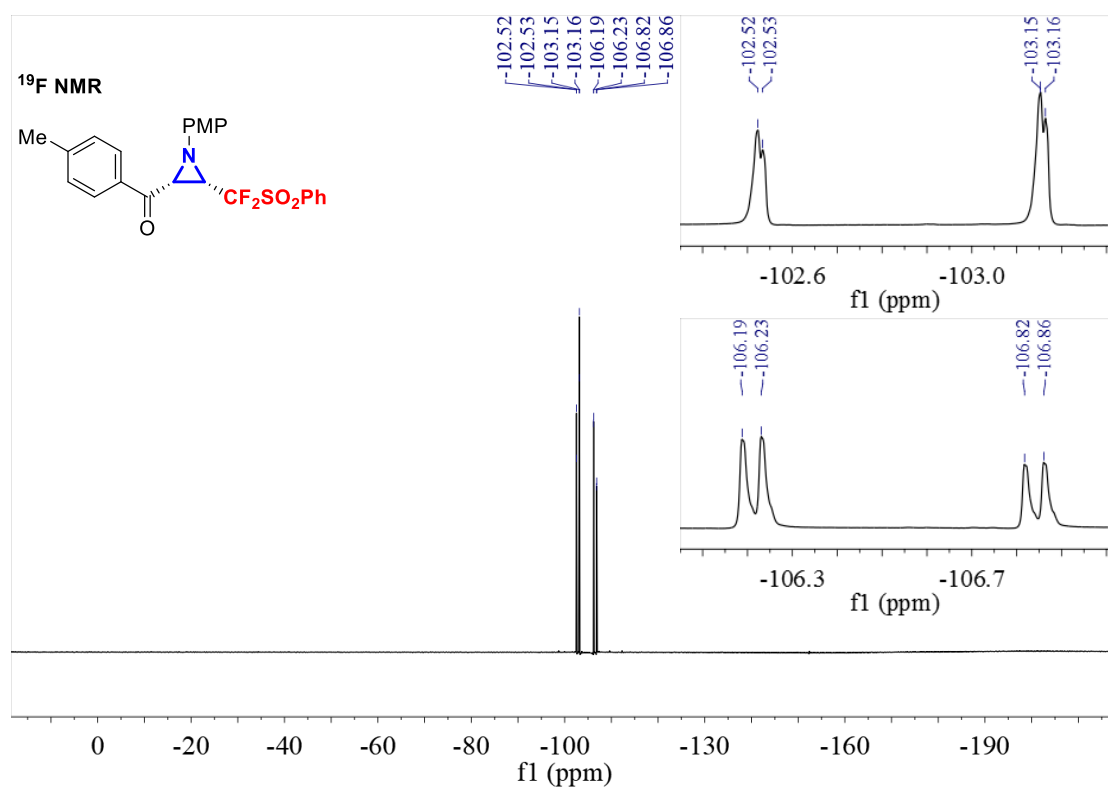

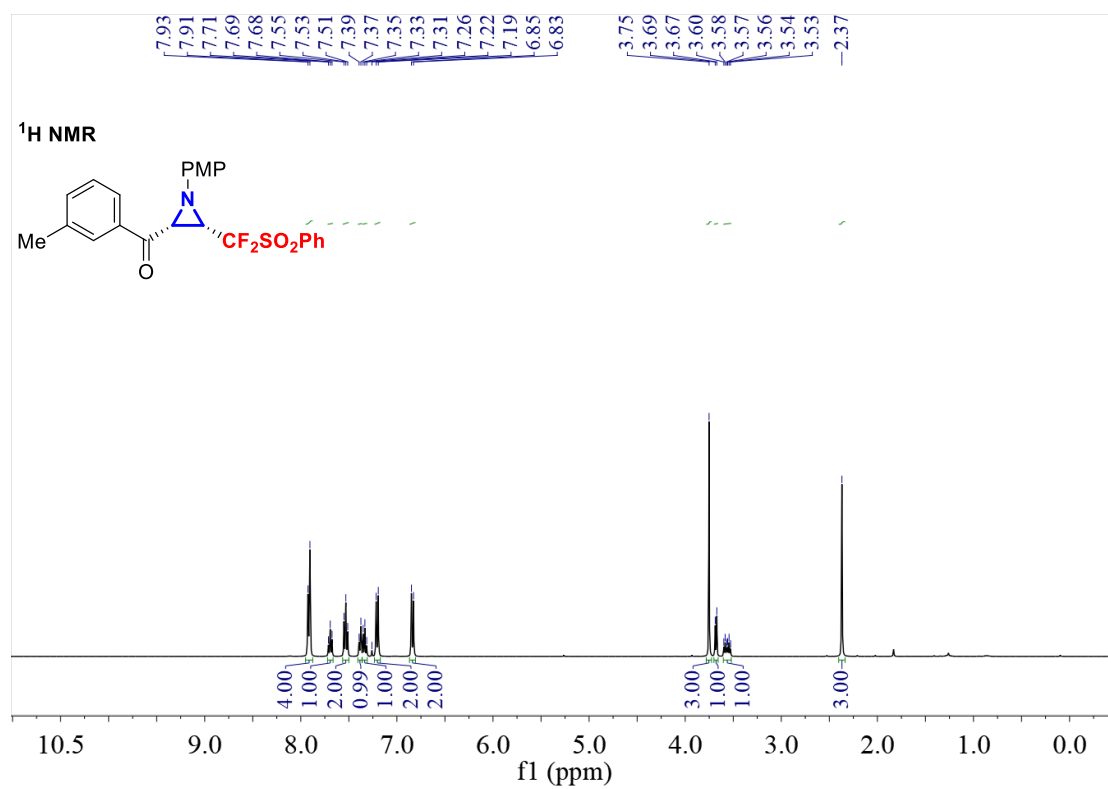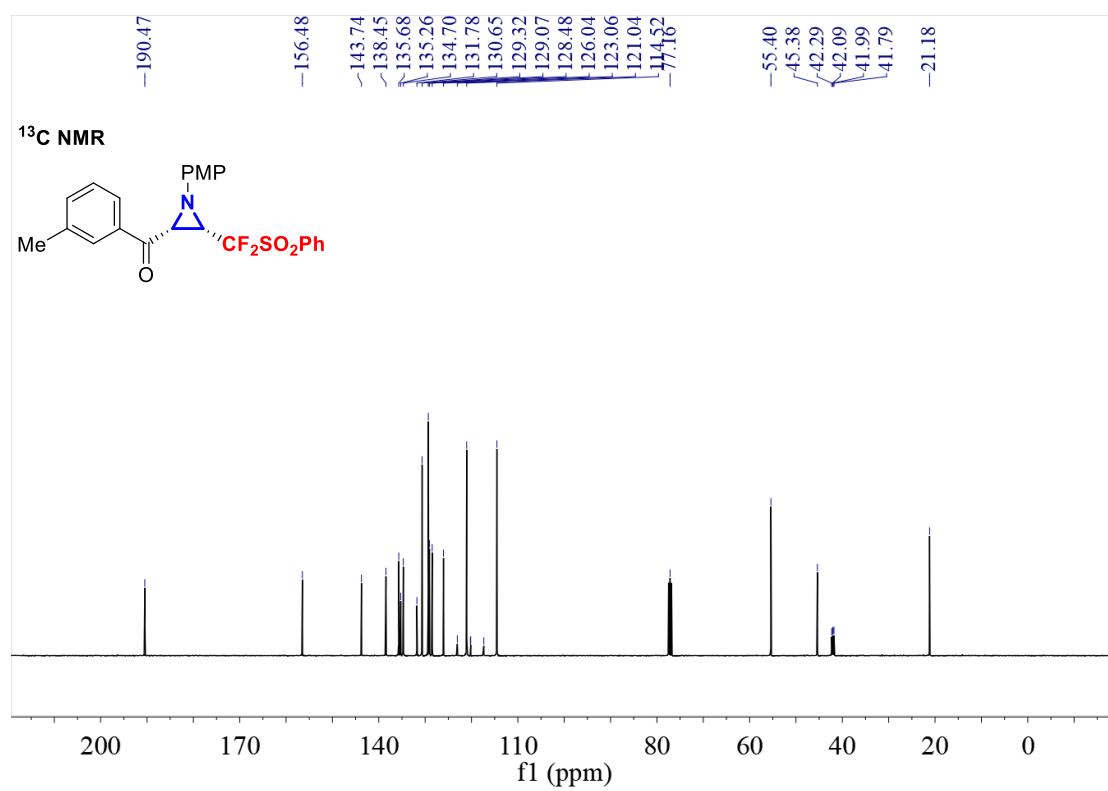

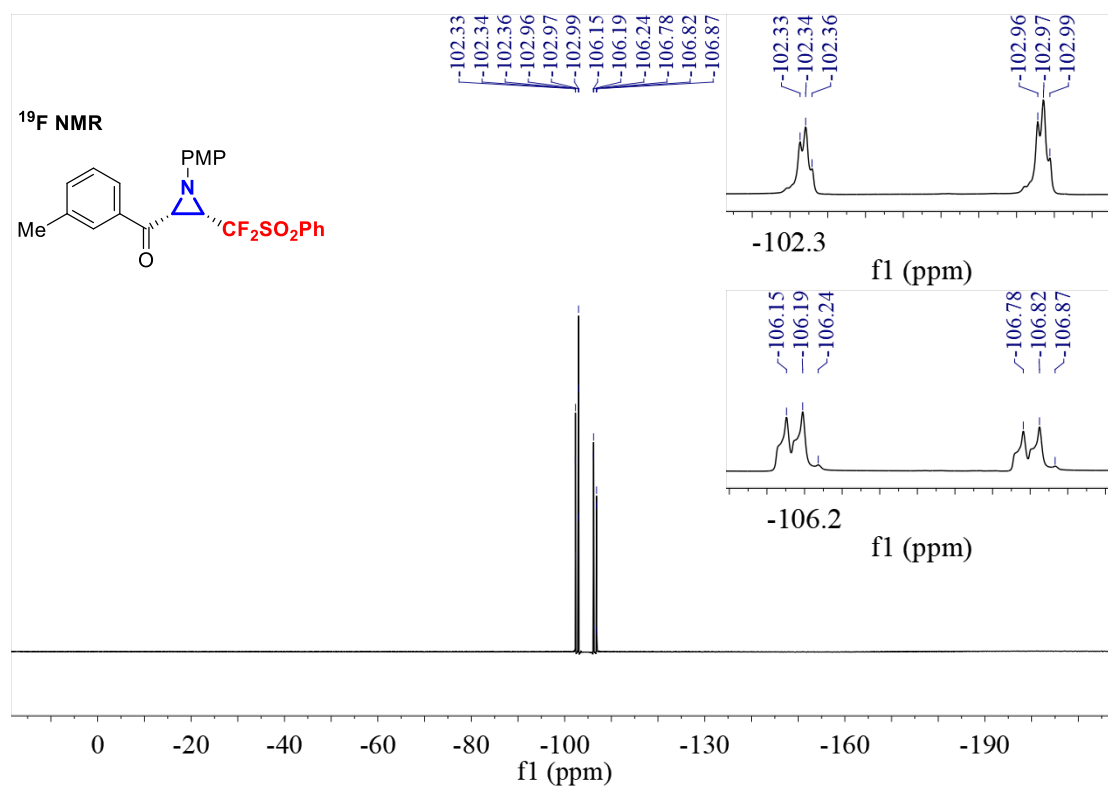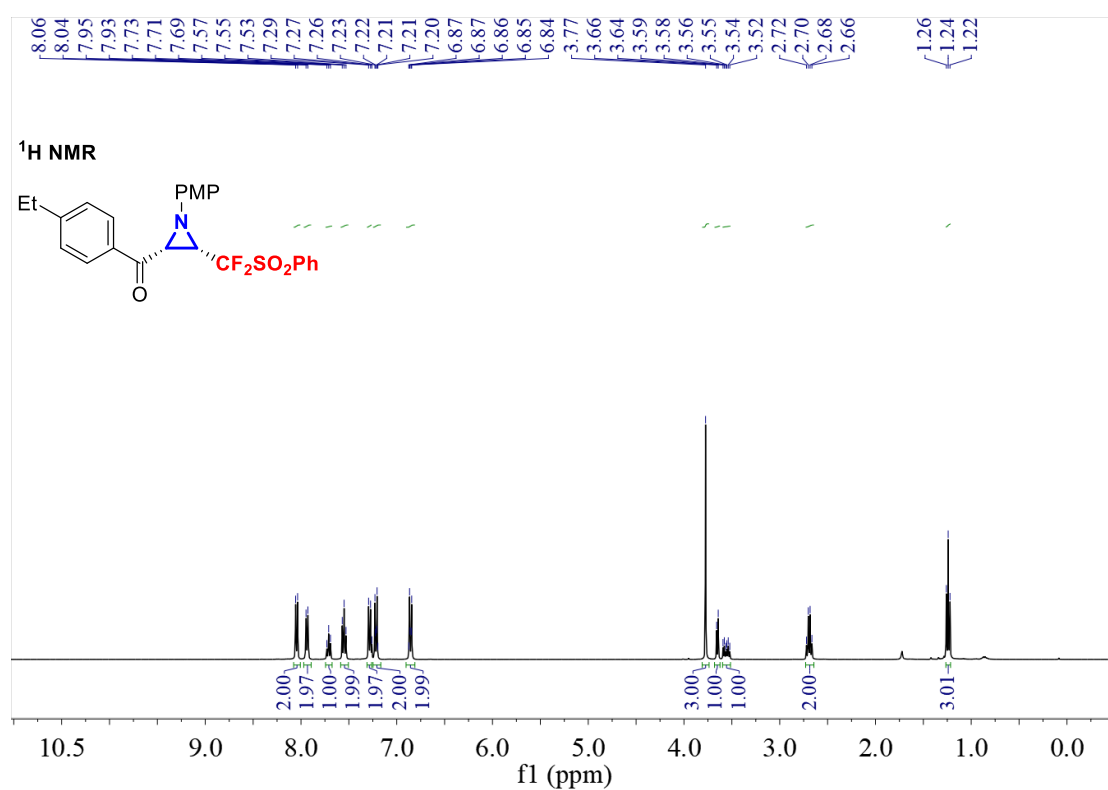

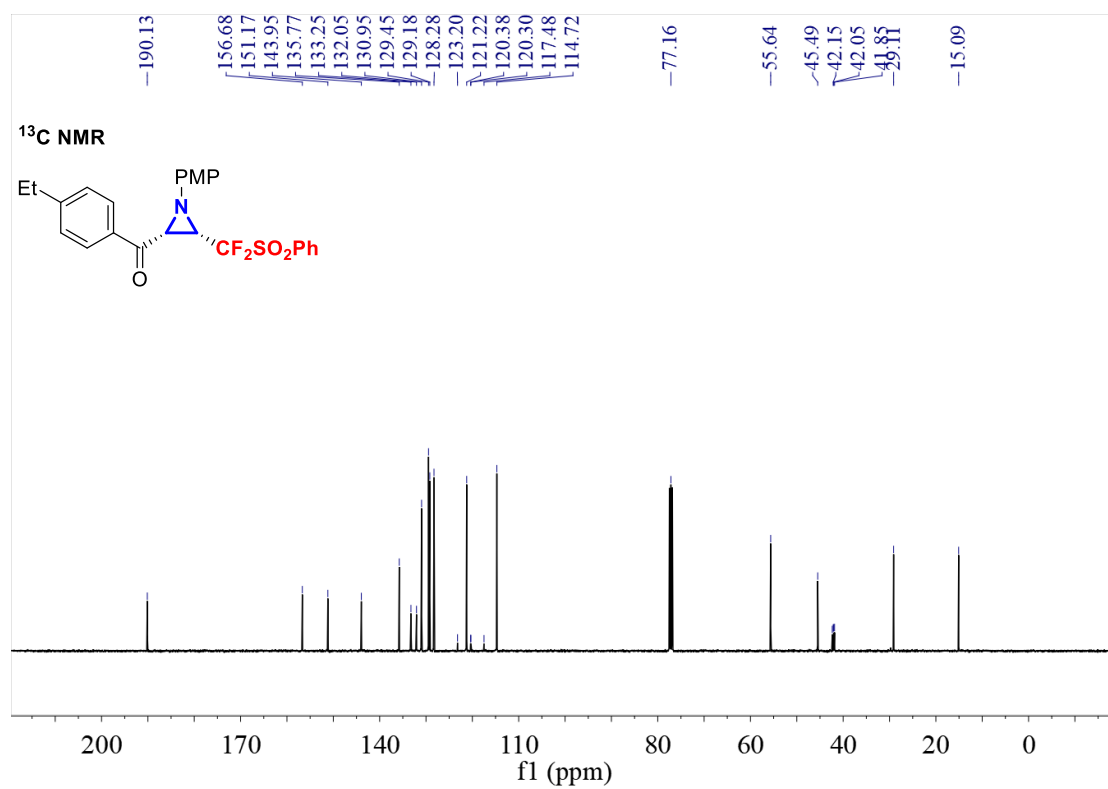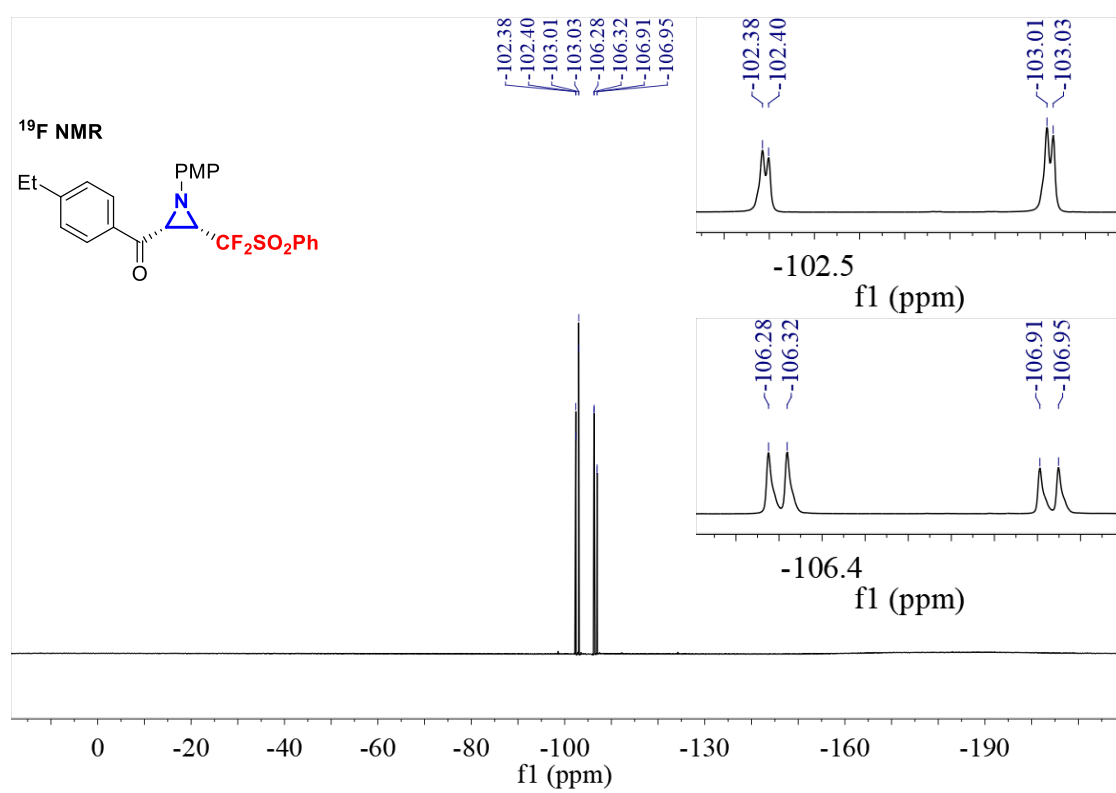



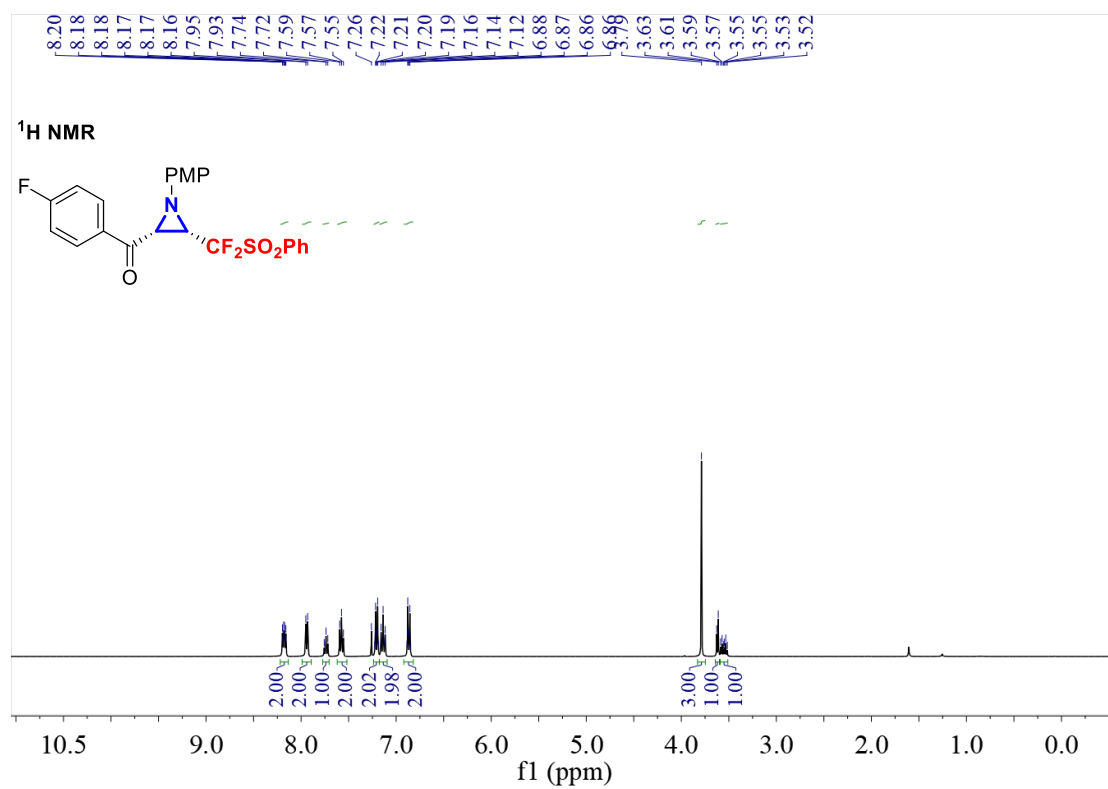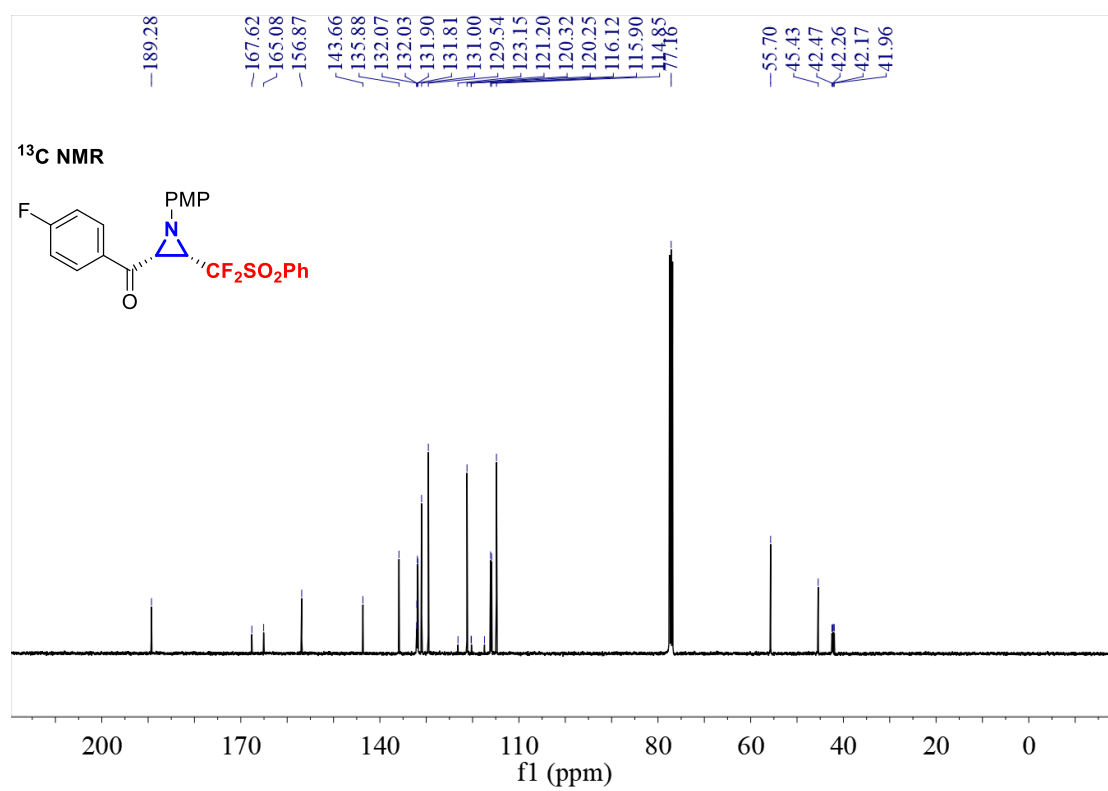

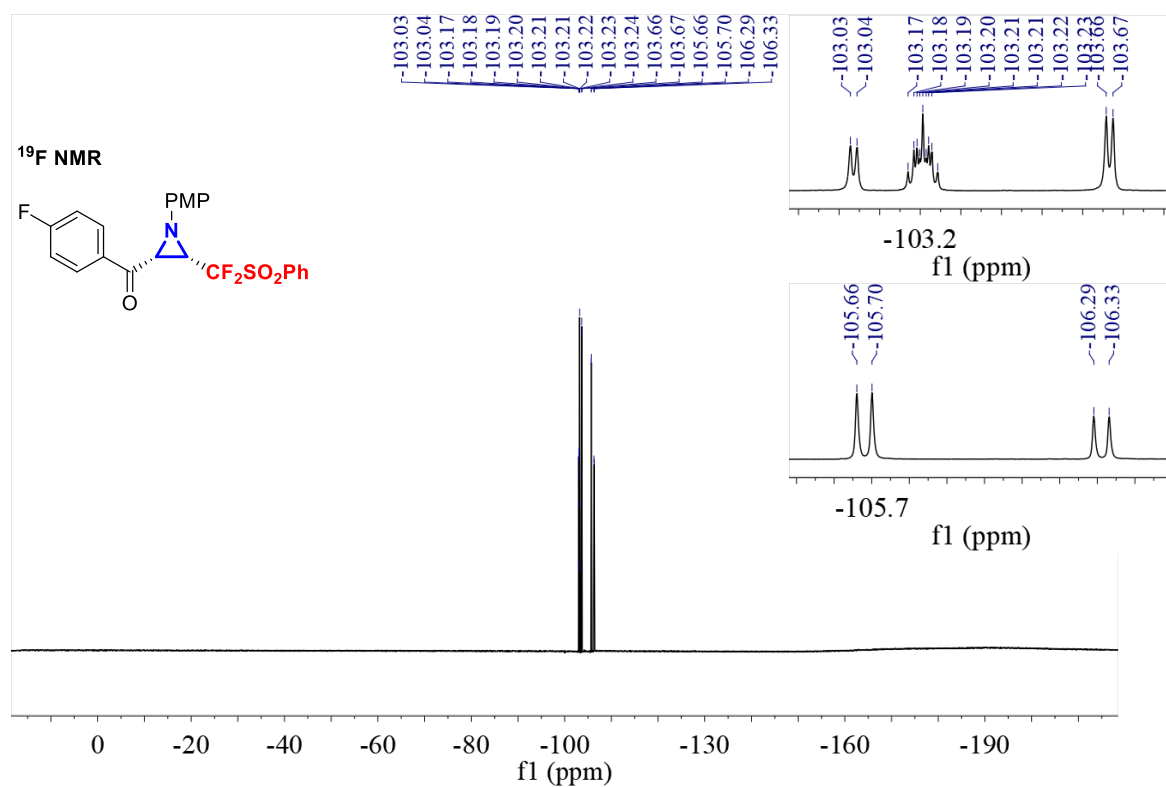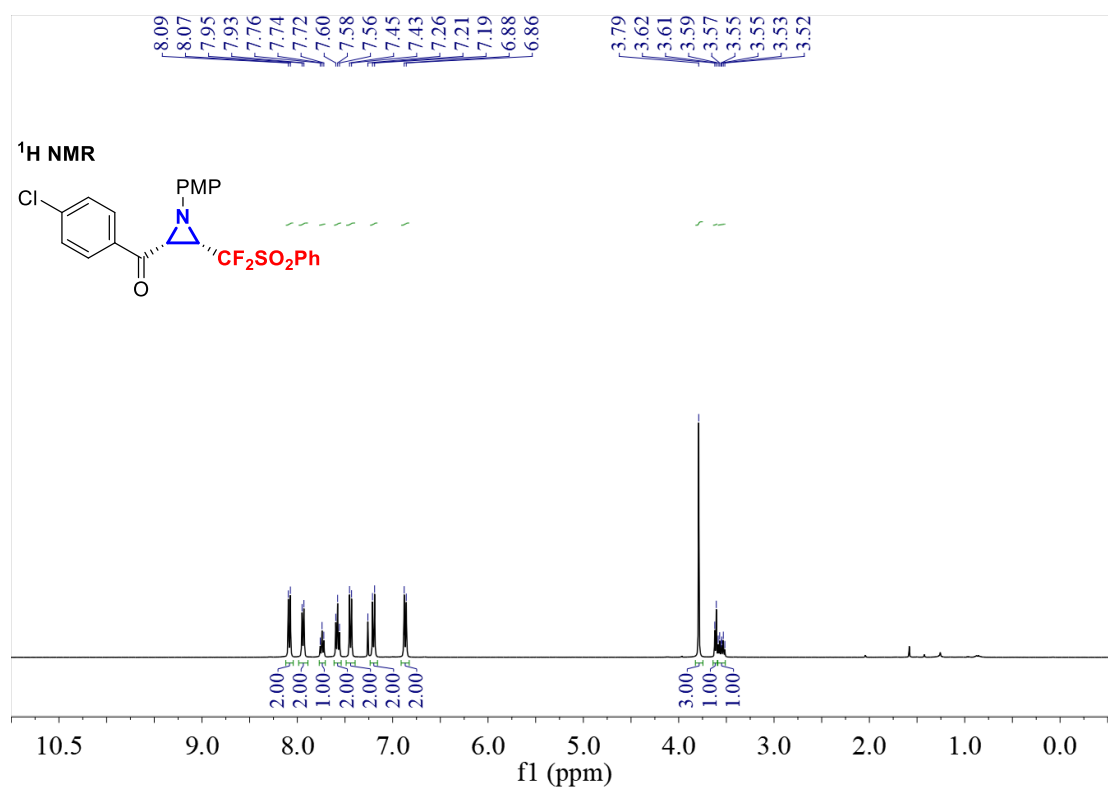

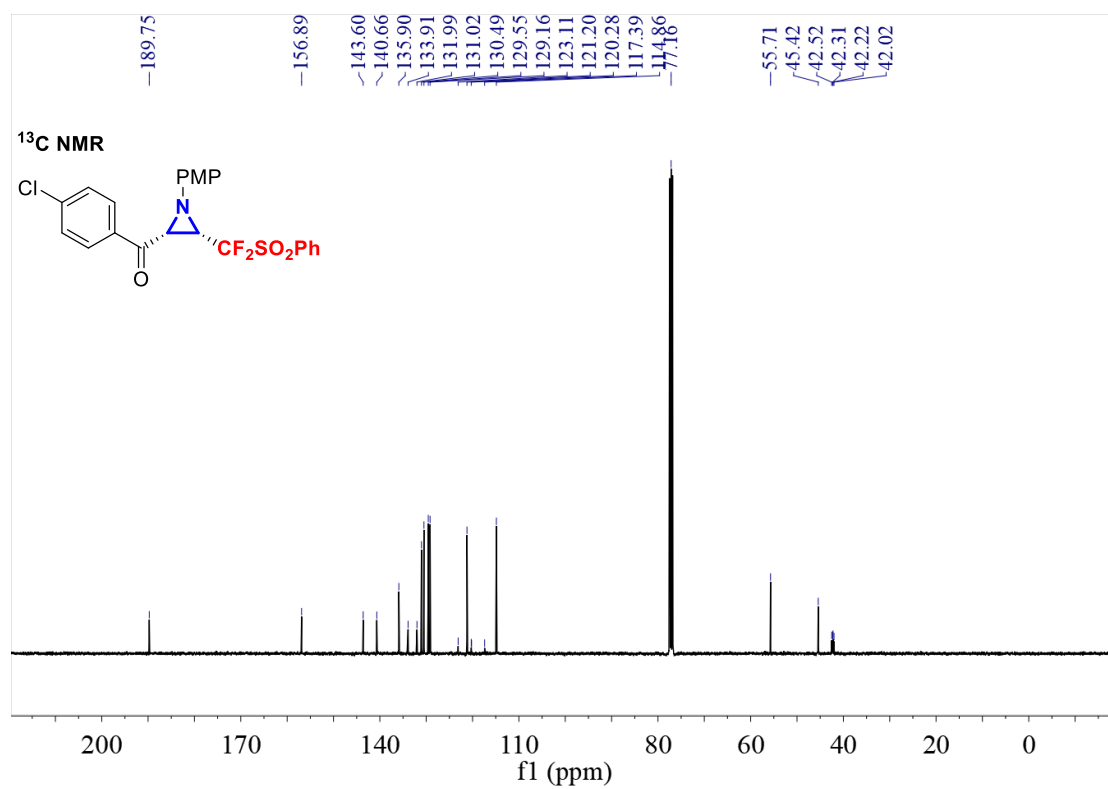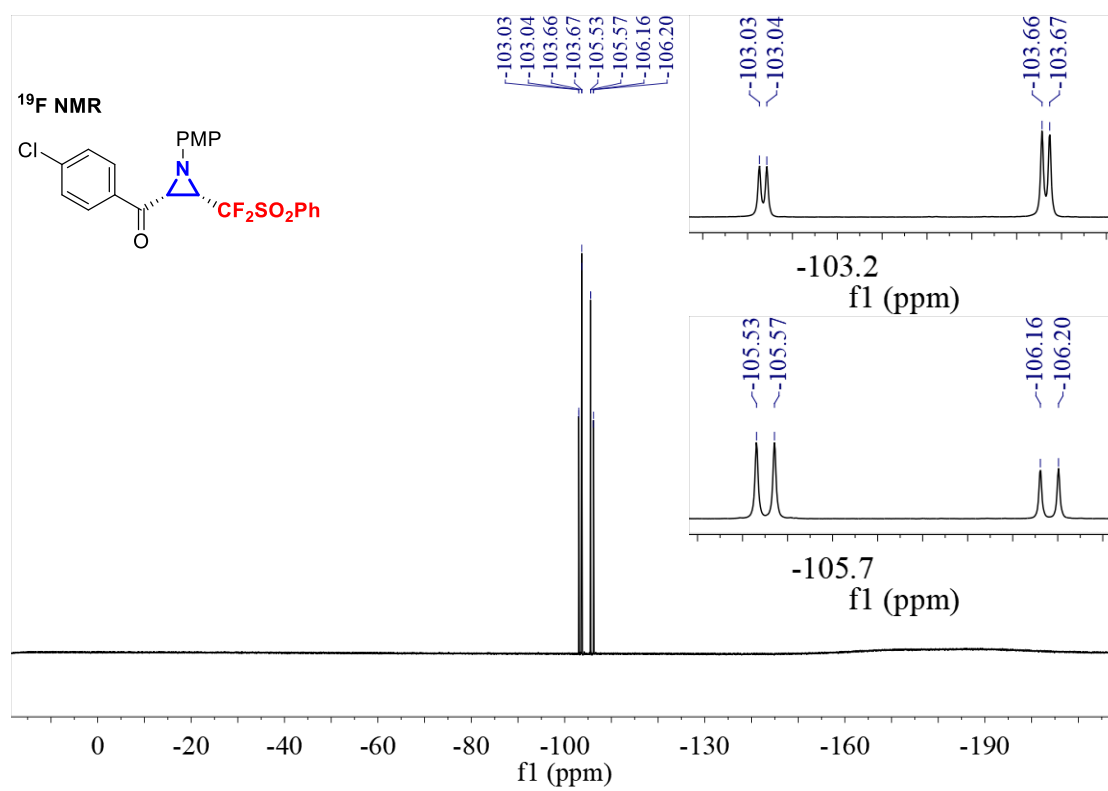

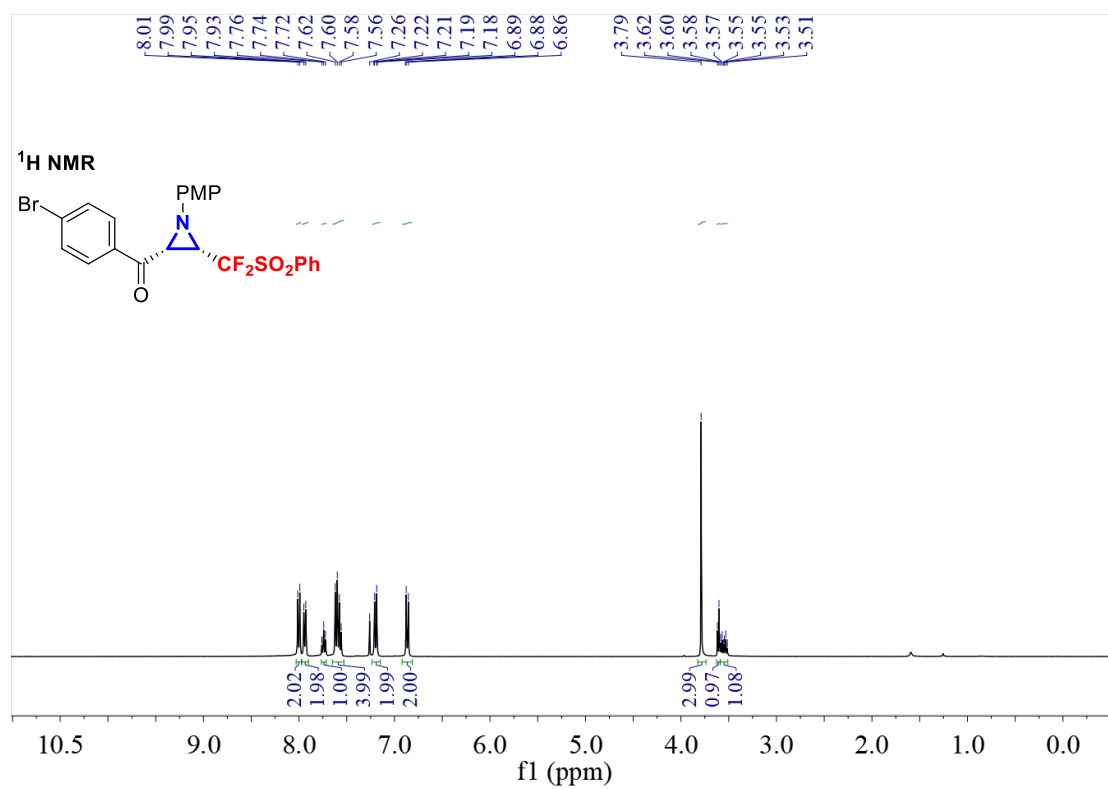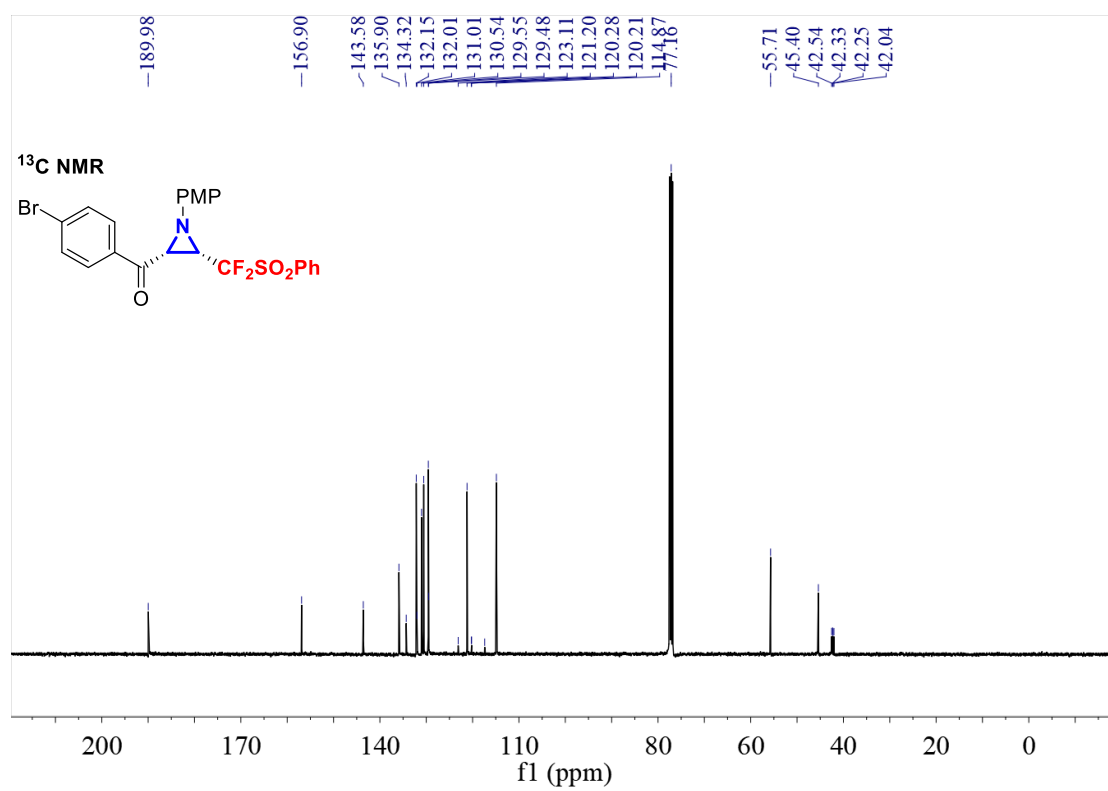

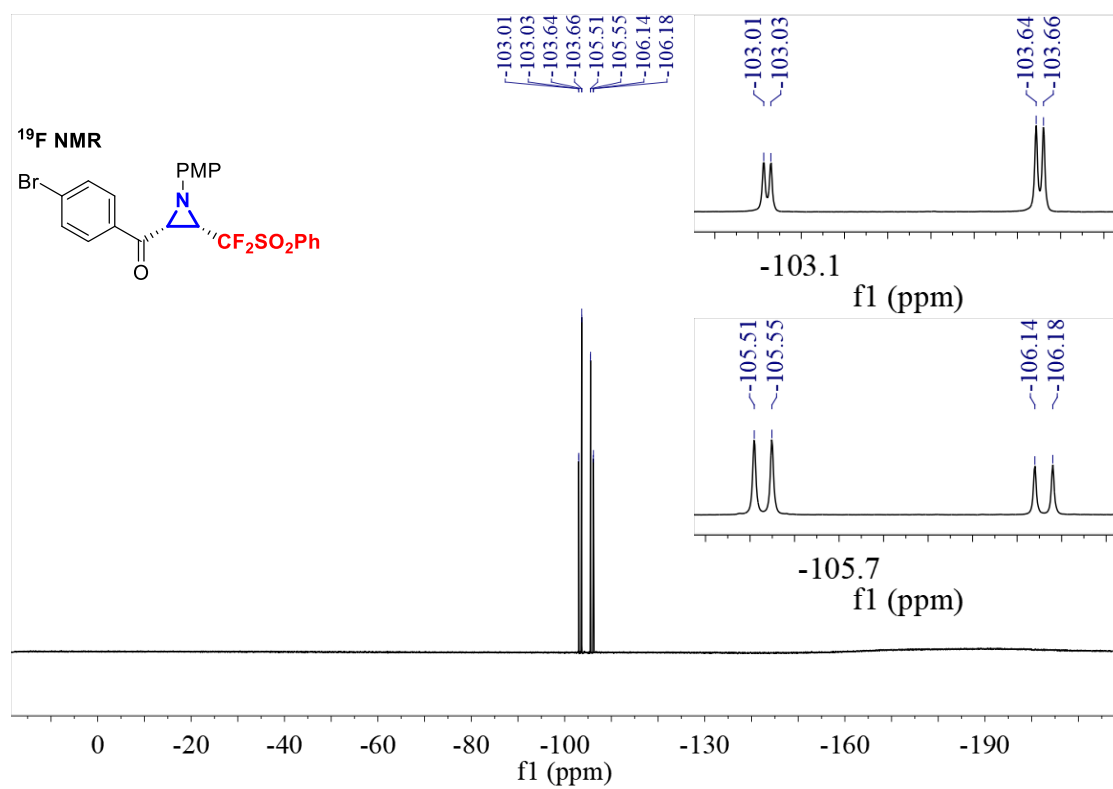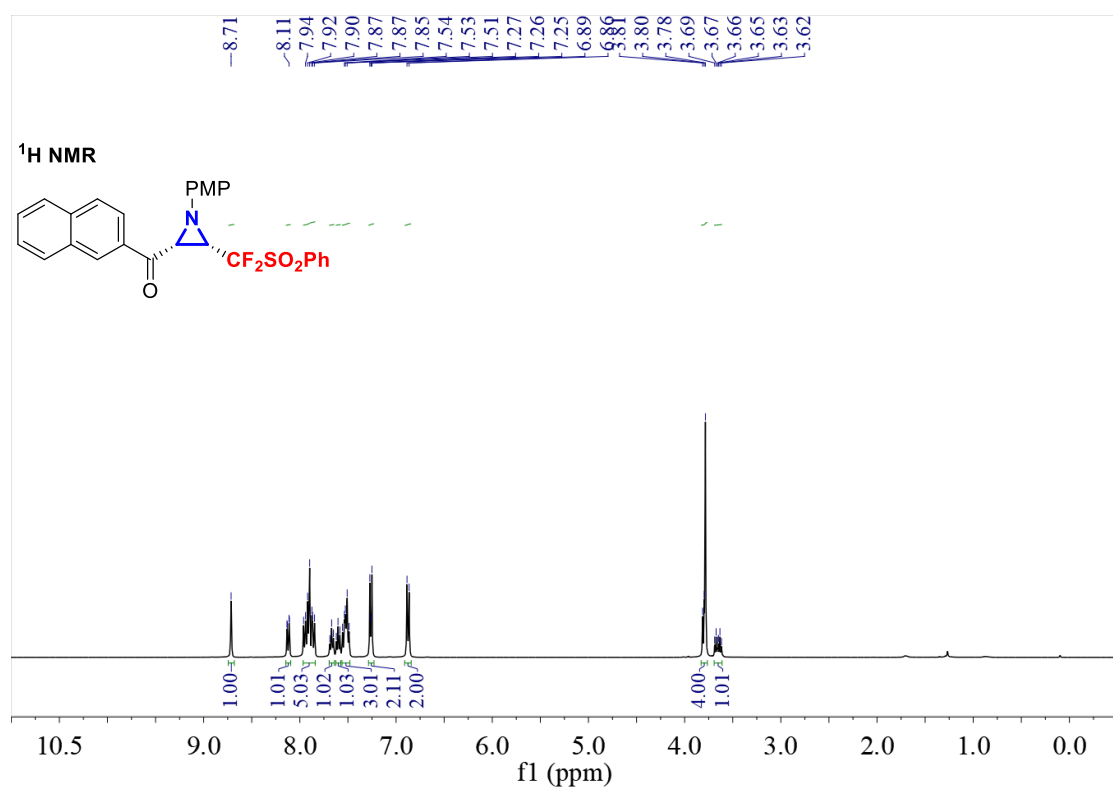

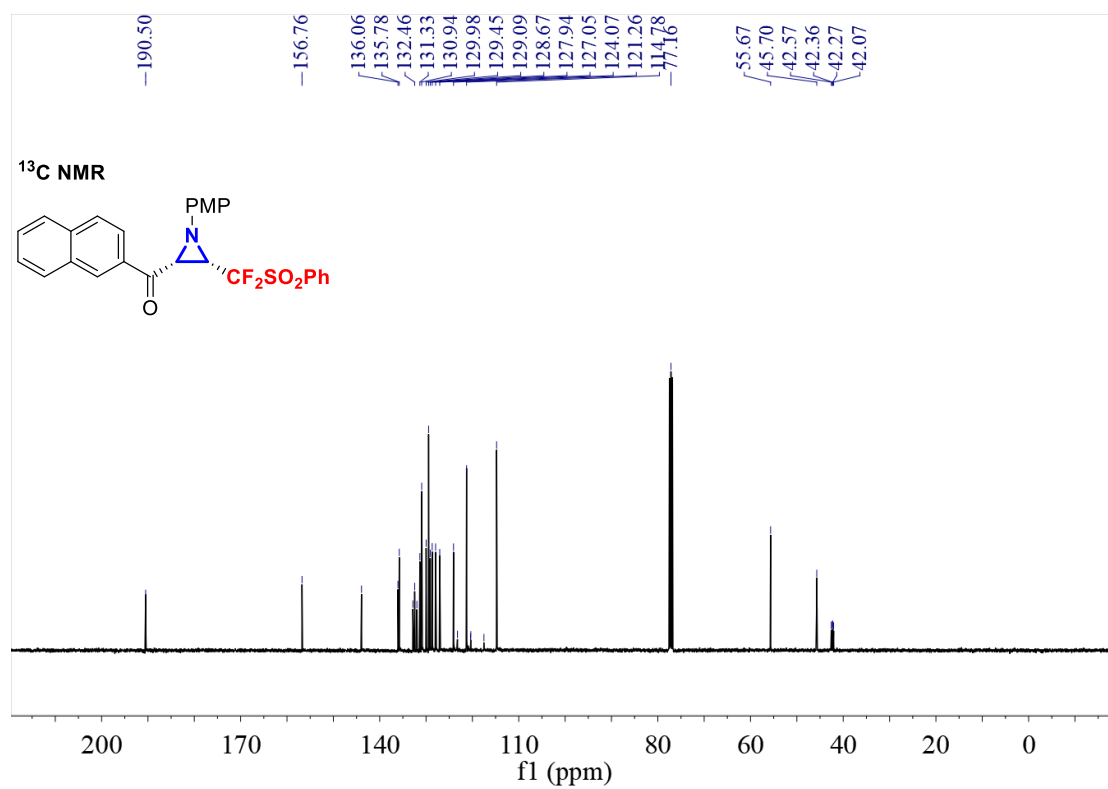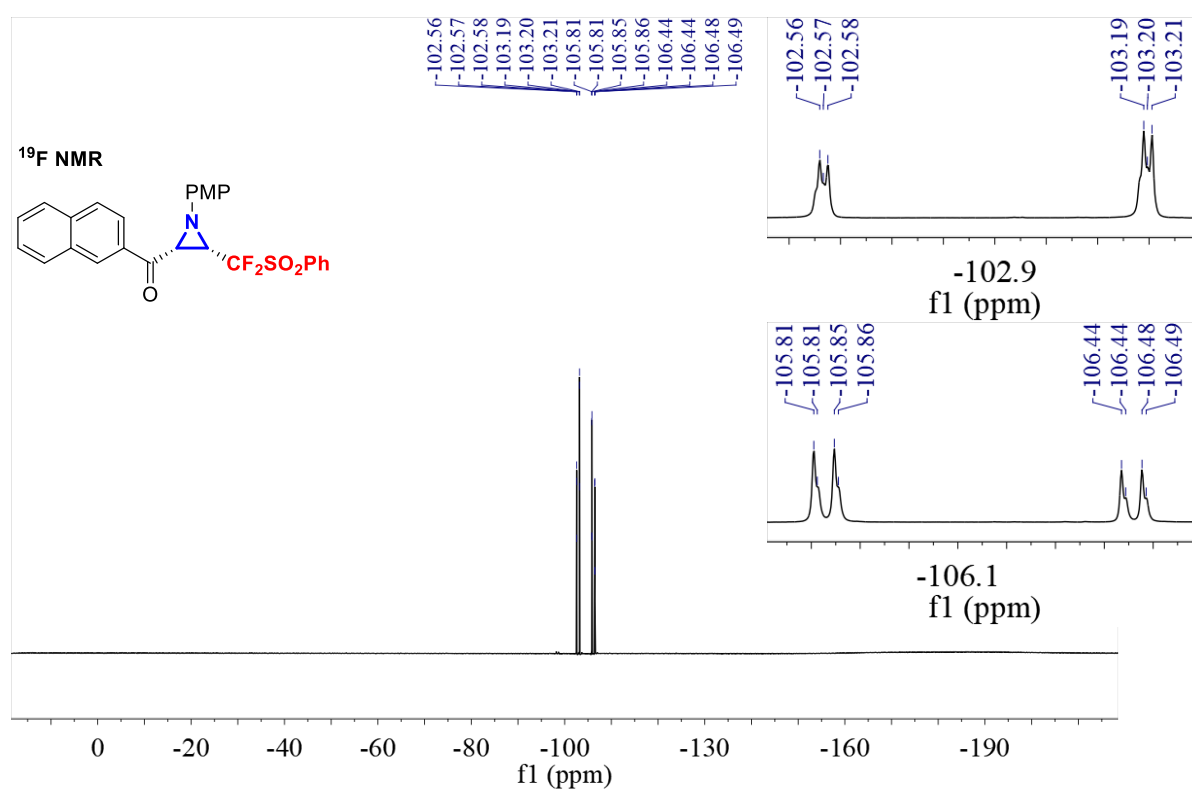

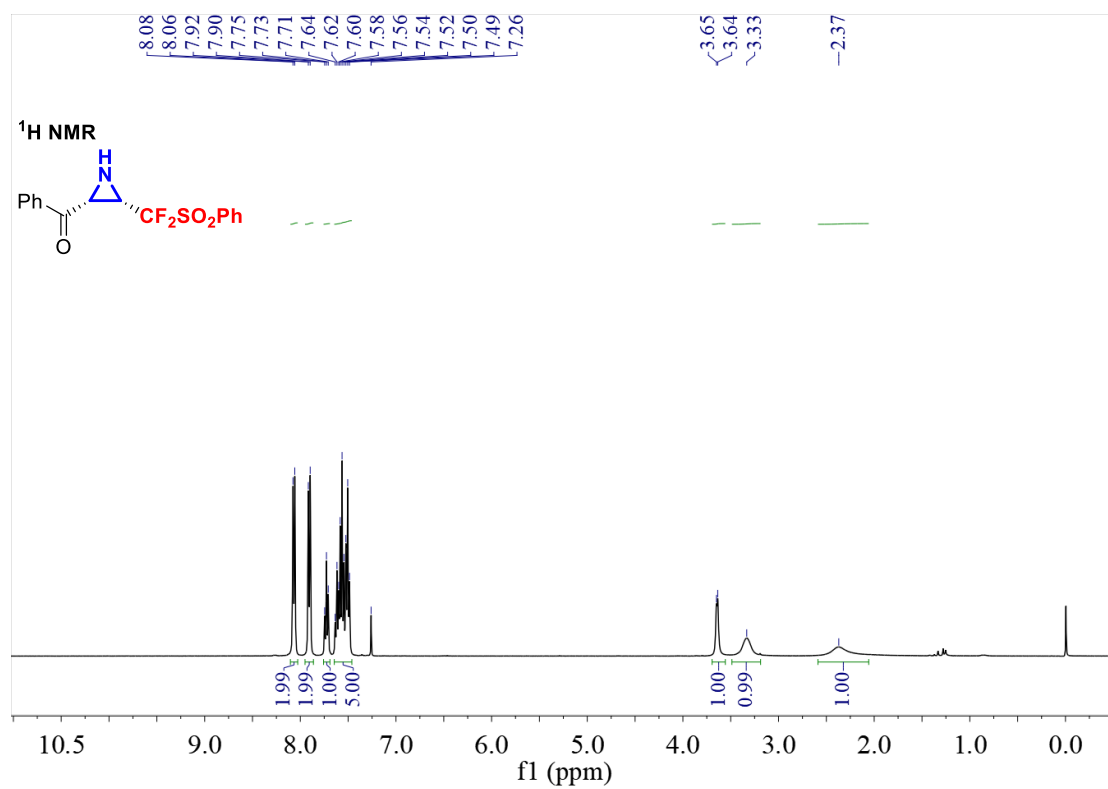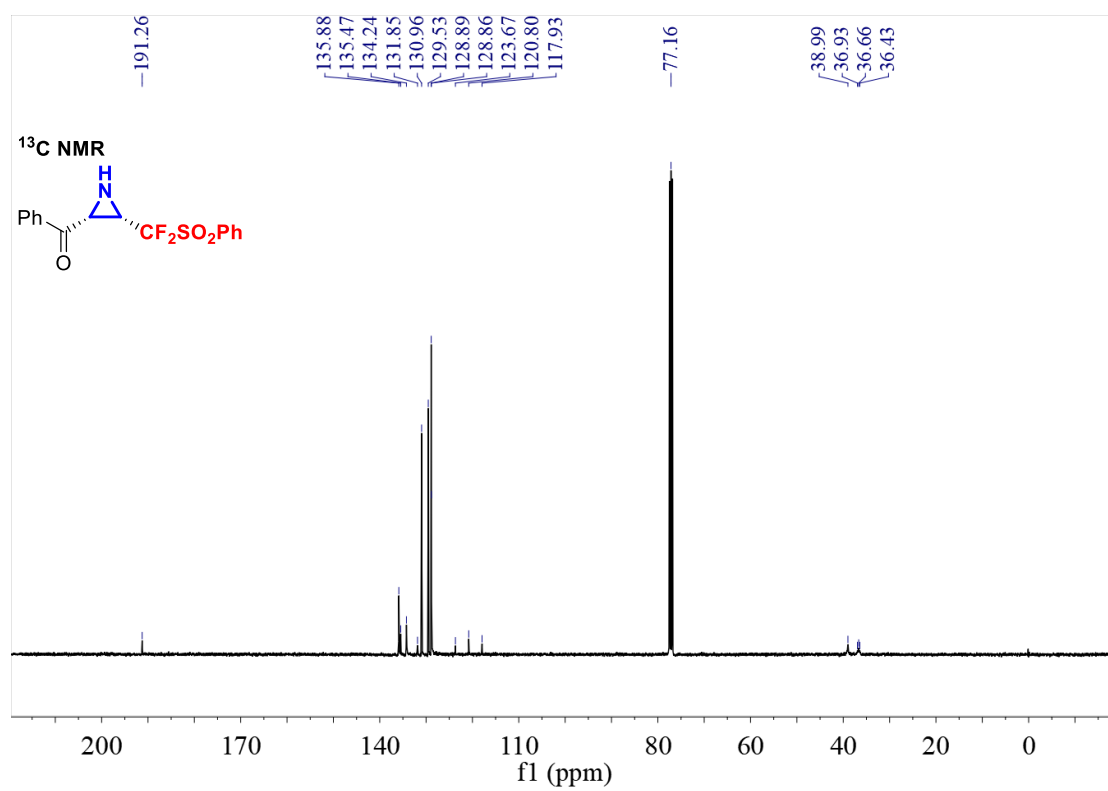

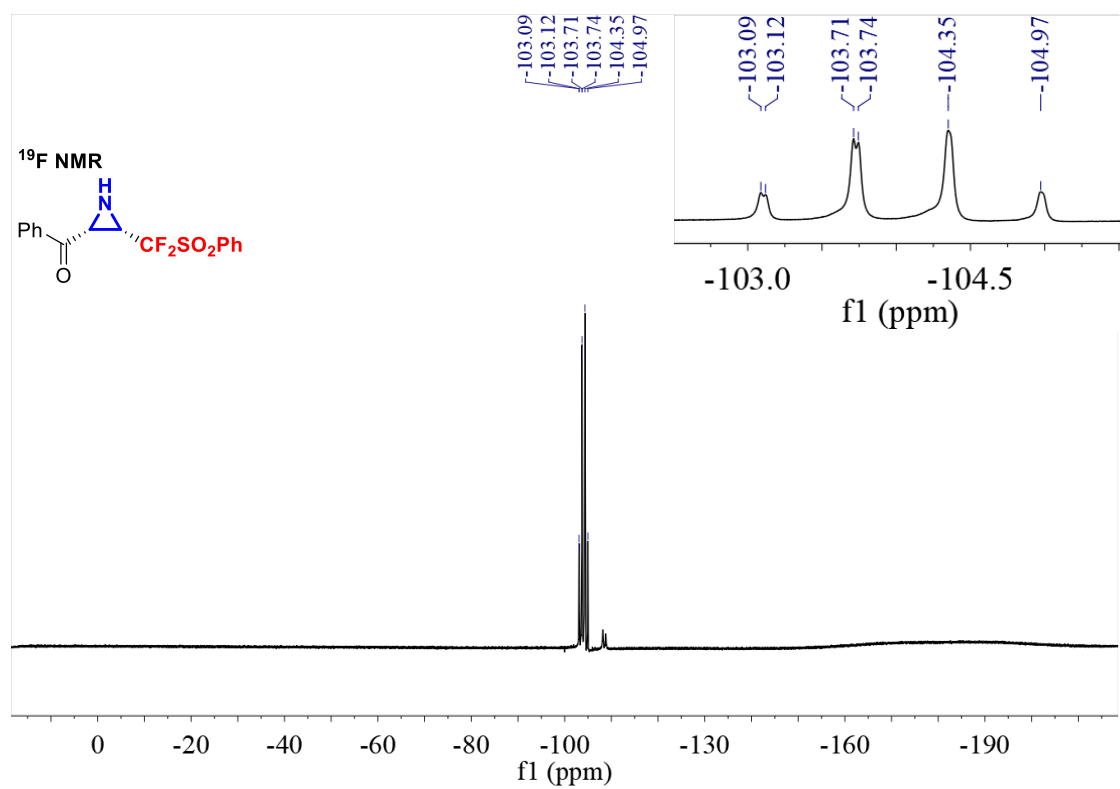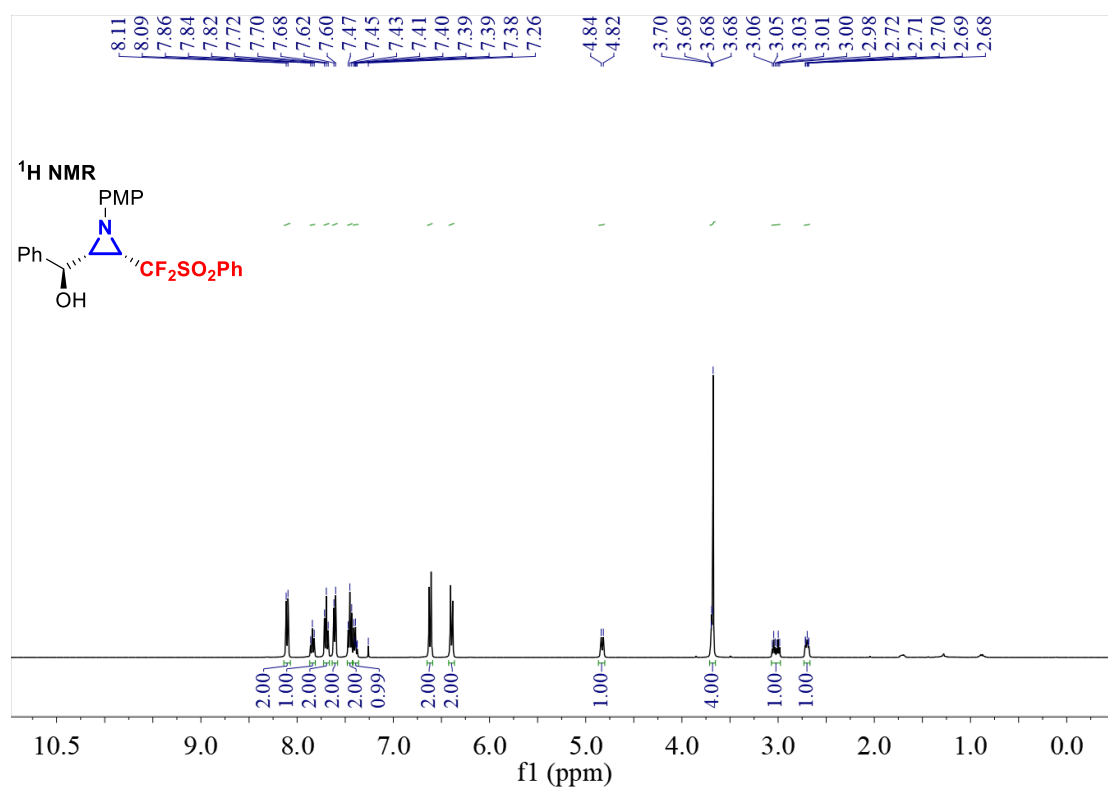



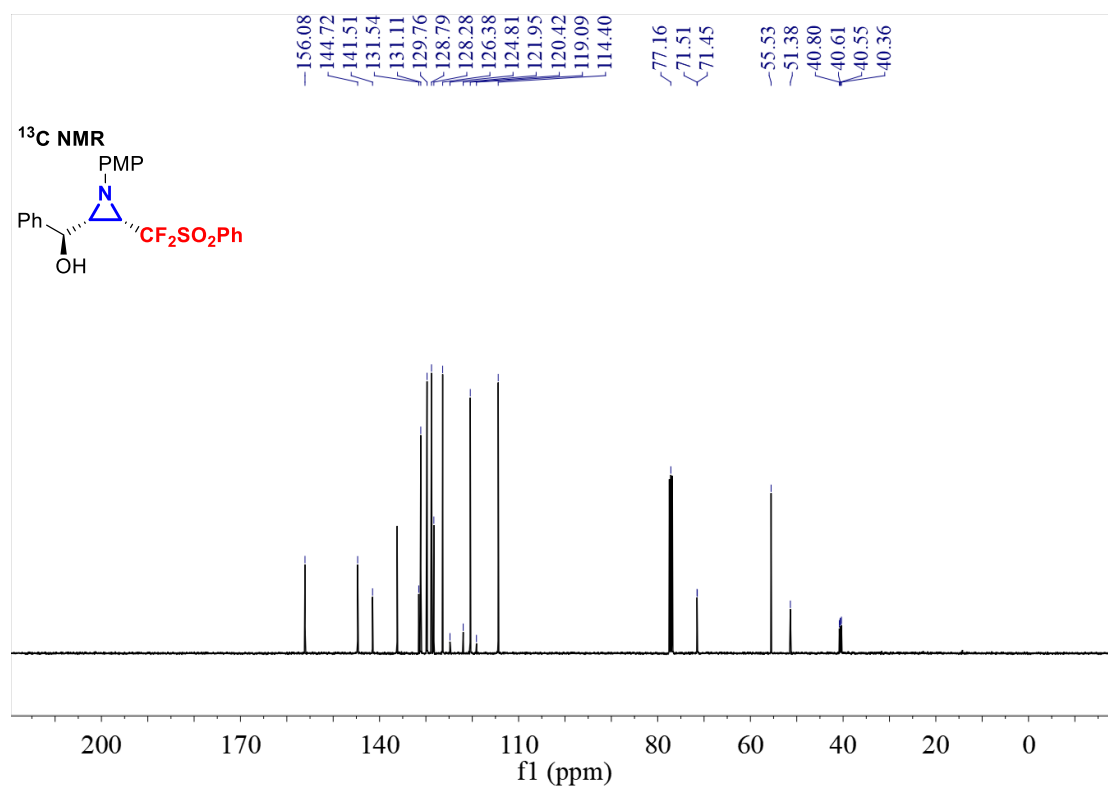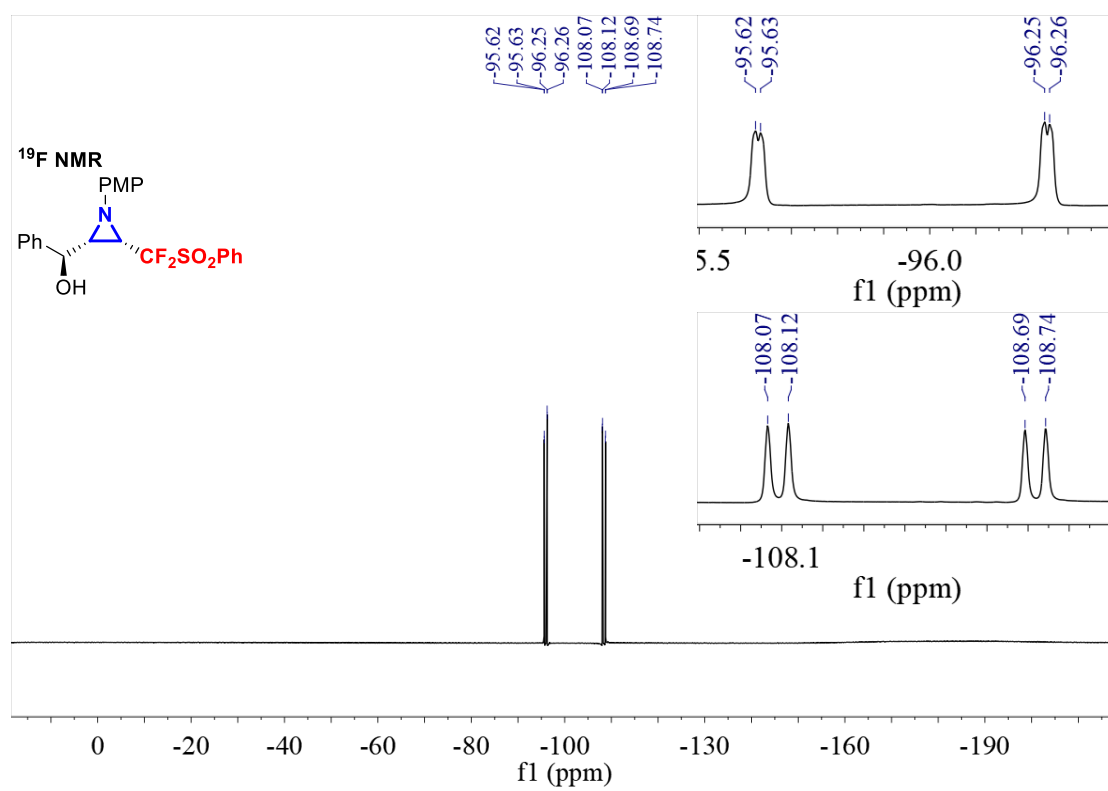

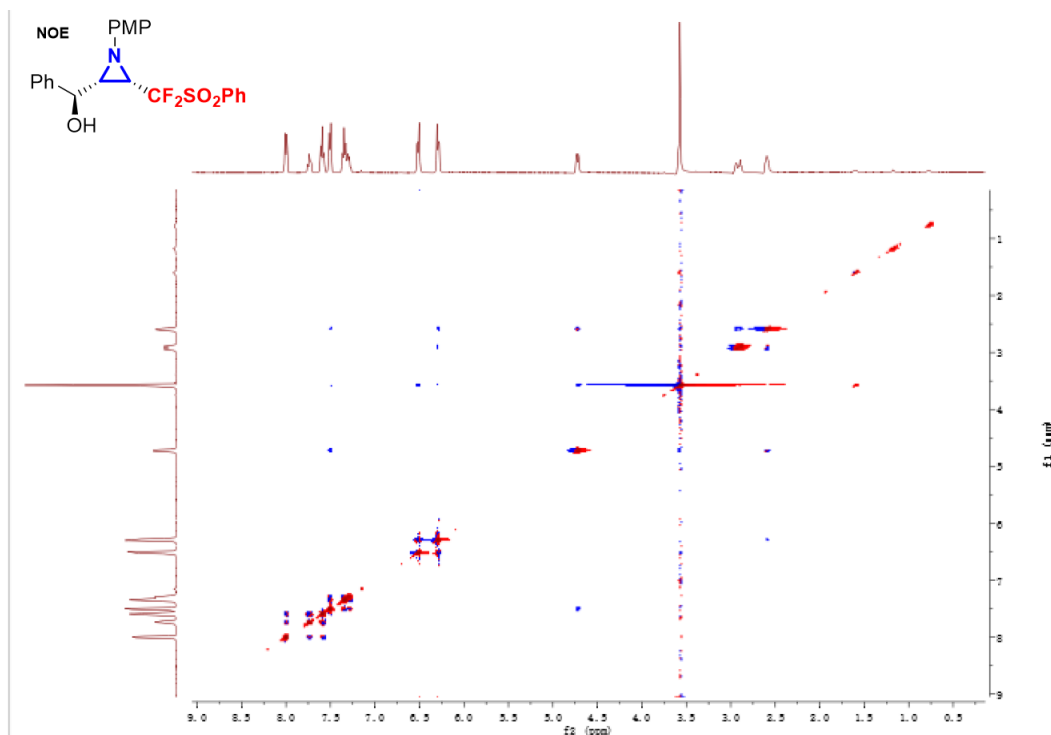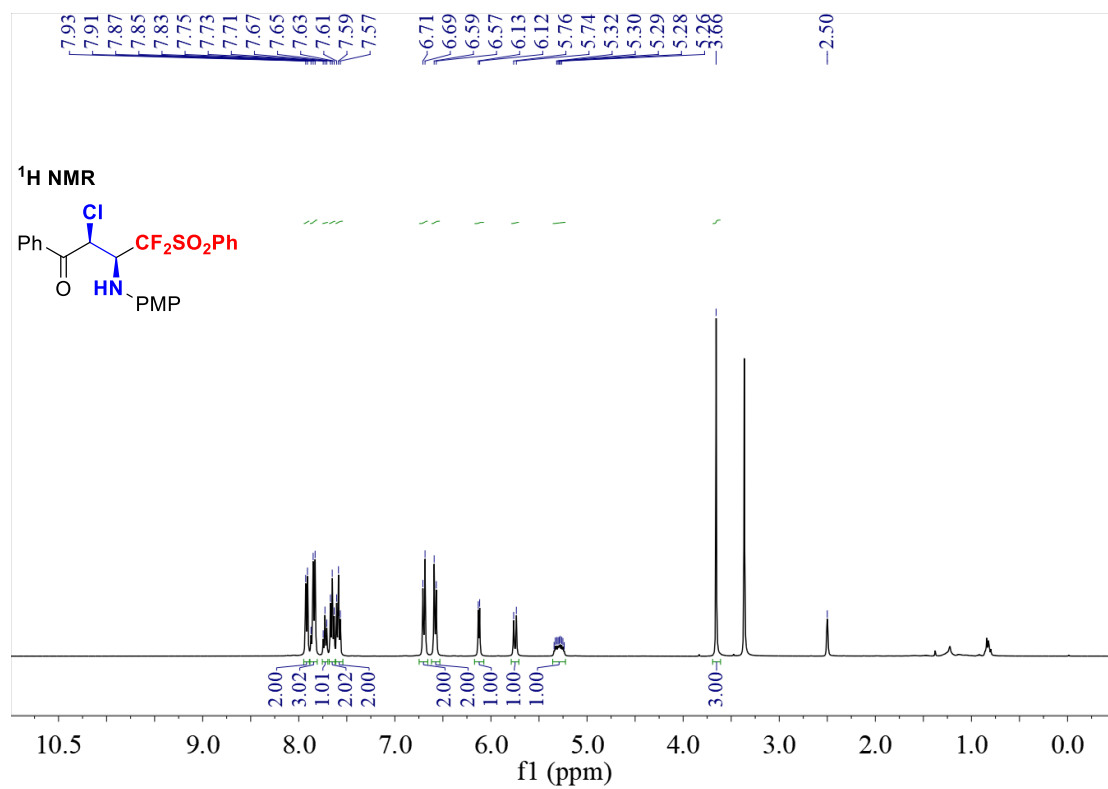

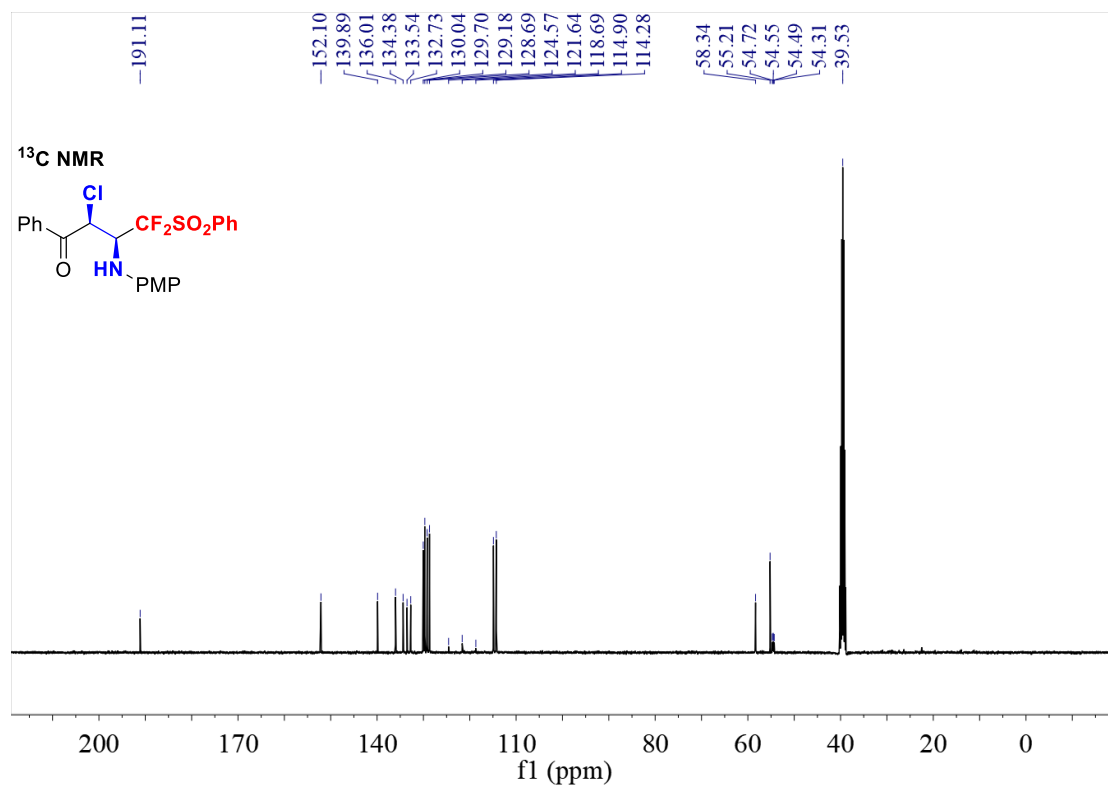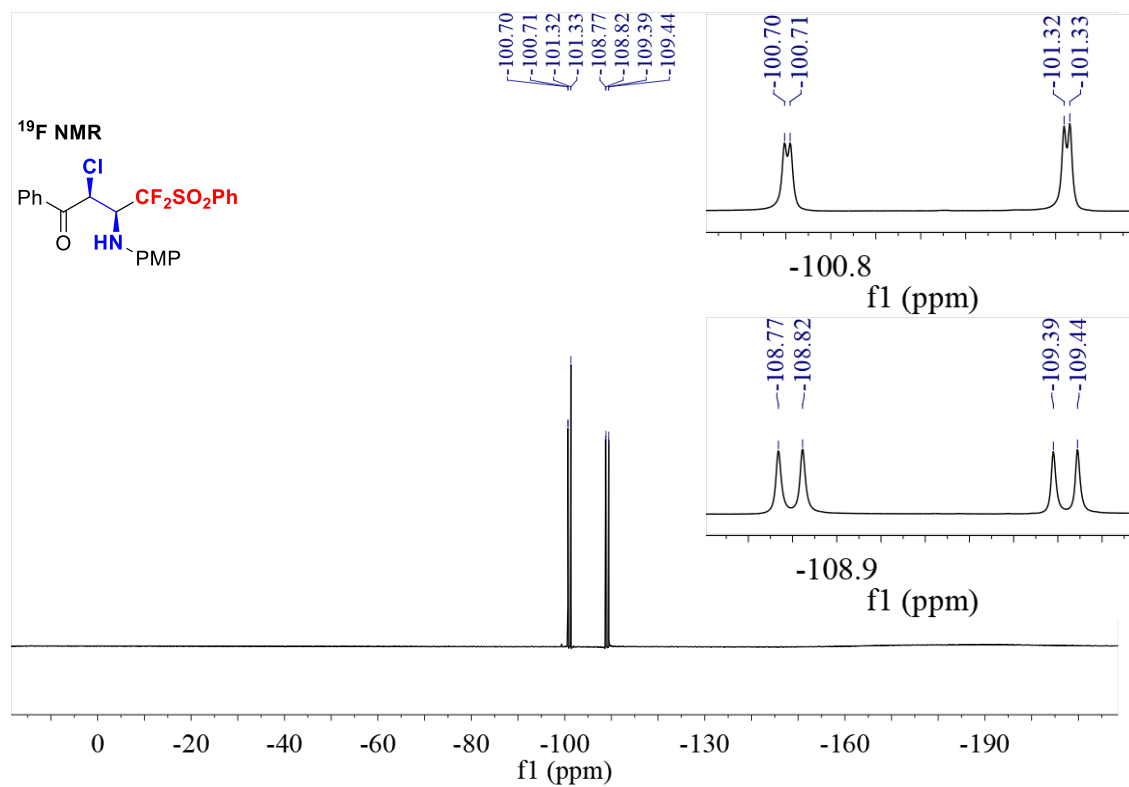

## 5 X-ray crystallographic data

5.1 The X-ray crystallographic structures for compound **4a**. Crystal data have been deposited to CCDC, number 1983642.

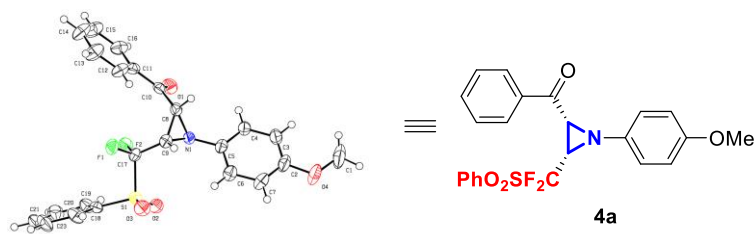

**Table 1 Crystal data and structure refinement for Compound 4a**

|                                             |                                                                  |
|---------------------------------------------|------------------------------------------------------------------|
| Identification code                         | 22019902TXF_0m                                                   |
| Empirical formula                           | C <sub>23</sub> H <sub>19</sub> F <sub>2</sub> NO <sub>4</sub> S |
| Formula weight                              | 443.45                                                           |
| Temperature/K                               | 173.0                                                            |
| Crystal system                              | monoclinic                                                       |
| Space group                                 | P2 <sub>1</sub>                                                  |
| a/Å                                         | 8.9940 (4)                                                       |
| b/Å                                         | 10.3367 (5)                                                      |
| c/Å                                         | 11.4489 (5)                                                      |
| α/°                                         | 90                                                               |
| β/°                                         | 91.170 (2)                                                       |
| γ/°                                         | 90                                                               |
| Volume/Å <sup>3</sup>                       | 1064.16 (8)                                                      |
| Z                                           | 2                                                                |
| ρ <sub>calc</sub> /cm <sup>3</sup>          | 1.384                                                            |
| μ/mm <sup>-1</sup>                          | 1.773                                                            |
| F (000)                                     | 460.0                                                            |
| Crystal size/mm <sup>3</sup>                | 0.19 × 0.15 × 0.12                                               |
| Radiatio                                    | CuKα (λ = 1.54184)                                               |
| 2θ range for data collection/°              | 12.392 to 133.332                                                |
| Index ranges                                | 10 ≤ h ≤ 10, -12 ≤ k ≤ 11, -13 ≤ l ≤ 13                          |
| Reflections collected                       | 8172                                                             |
| Independent reflections                     | 3473 [R <sub>int</sub> = 0.0278, R <sub>sigma</sub> = 0.0417]    |
| Data/restraints/parameters                  | 3473/1/281                                                       |
| Goodness-of-fit on F <sup>2</sup>           | 1.117                                                            |
| Final R indexes [I ≥ 2σ (I)]                | R <sub>1</sub> = 0.0302, wR <sub>2</sub> = 0.0771                |
| Final R indexes [all data]                  | R <sub>1</sub> = 0.0304, wR <sub>2</sub> = 0.0772                |
| Largest diff. peak/hole / e Å <sup>-3</sup> | 0.24/-0.29                                                       |
| Flack parameter                             | 0.064 (8)                                                        |

5.2 The X-ray crystallographic structures for compound **5c**. Crystal data have been deposited to CCDC, number 1983643.

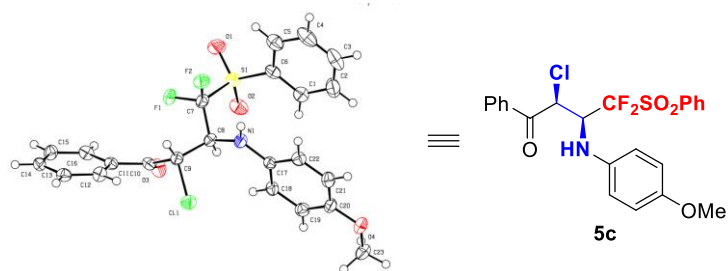

**Table 1 Crystal data and structure refinement for Compound 5c**

| Identification code                         | DS                                                                 |
|---------------------------------------------|--------------------------------------------------------------------|
| Empirical formula                           | C <sub>23</sub> H <sub>20</sub> ClF <sub>2</sub> NO <sub>4</sub> S |
| Formula weight                              | 479.91                                                             |
| Temperature/K                               | 170.0                                                              |
| Crystal system                              | monoclinic                                                         |
| Space group                                 | P2 <sub>1</sub>                                                    |
| a/Å                                         | 5.5826 (8)                                                         |
| b/Å                                         | 16.132 (2)                                                         |
| c/Å                                         | 11.8958 (13)                                                       |
| α/°                                         | 90                                                                 |
| β/°                                         | 90.12 (5)                                                          |
| γ/°                                         | 90                                                                 |
| Volume/Å <sup>3</sup>                       | 1071.3 (2)                                                         |
| Z                                           | 2                                                                  |
| ρ <sub>calc</sub> /cm <sup>3</sup>          | 1.488                                                              |
| μ/mm <sup>-1</sup>                          | 0.325                                                              |
| F (000)                                     | 496.0                                                              |
| Crystal size/mm <sup>3</sup>                | 0.19 × 0.12 × 0.08                                                 |
| Radiation                                   | MoKα (λ = 0.71073)                                                 |
| 2θ range for data collection/°              | 5.05 to 53.128                                                     |
| Index ranges                                | -6 ≤ h ≤ 7, -20 ≤ k ≤ 19, -14 ≤ l ≤ 14                             |
| Reflections collected                       | 12417                                                              |
| Independent reflections                     | 4273 [R <sub>int</sub> = 0.0518, R <sub>sigma</sub> = 0.0626]      |
| Data/restraints/parameters                  | 4273/1/290                                                         |
| Goodness-of-fit on F <sup>2</sup>           | 1.035                                                              |
| Final R indexes [I ≥ 2σ (I)]                | R <sub>1</sub> = 0.0434, wR <sub>2</sub> = 0.0836                  |
| Final R indexes [all data]                  | R <sub>1</sub> = 0.0685, wR <sub>2</sub> = 0.0982                  |
| Largest diff. peak/hole / e Å <sup>-3</sup> | 0.25/-0.32                                                         |
| Flack parameter                             | -0.07 (5)                                                          |
